# Supplementary material for: In silico prioritisation of candidate genes for prokaryotic gene function discovery: an application of phylogenetic profiles
Source: Springer Nature journal article supplement (doi:10.1186/1471-2105-10-86), 2009-03-17
Supplement: 12859_2008_2816_MOESM1_ESM.pdf [file 12859_2008_2816_MOESM1_ESM.pdf]

## Additional file 1 — Scoring functions applied in statistical CGP

- *Gene*  $g_i$ : a gene
- *Strain*  $s_j$ : a bacterial isolate
- *Genome*  $\mathbf{G}_j$ : The corresponding genome of  $s_j$ , which consists of the entire set of genes such that

$$s_j \xrightarrow{\text{has}} \mathbf{G}_j = \{g_{j_1}, g_{j_2}, \dots, g_{j_m}\}$$

- *Gene product*  $y_k$ : the product of a gene (i.e.. protein or RNA). For every gene product  $y_k$ , there exists at least one encoding gene  $g_i$

$$g_i \Rightarrow y_k$$

- *Gene equivalence*: Two genes are considered equivalent if genes  $g_i$  and  $g_j$  both encode for the same gene product  $y_k$ , i.e.

$$g_i \equiv g_j \text{ if } g_i \Rightarrow y_k \text{ and } g_j \Rightarrow y_k$$

- *Set of gene products*: gene products of strain  $s_j$

$$\mathbf{G}_j \xrightarrow{\text{encodes for}} \mathbf{Y}_j = \{y_{j_1}, y_{j_2}, \dots, y_{j_n}\}$$

- *Phenotype or function*  $p$ : the phenotypic expression of a bacterial strain
- *Phenotypic examples*  $\mathbf{E}_p$ : For each phenotype  $p$ , a list of phenotypic examples can be gathered. Each  $e_j$  correspond to a bacterial strain  $s_j$ .

$$\mathbf{E}_p = \{e_{p_1}, e_{p_2}, \dots, e_{p_n}\}$$

where  $e_{p_k} \in \{s_{p_1}, s_{p_2}, \dots, s_{p_n}\}$ , are selected from bacterial strains display phenotype  $p$ .

### Scoring functions

#### Sensitivity (*sens*) and specificity (*spec*)

Sensitivity is the proportion of candidate genes  $g$  present in genome  $\mathbf{G}$  displaying phenotype  $p$ , whereas specificity is the proportion of genes  $g$  absent in genomes  $\mathbf{G}$  that also do not display  $p$ . These measures are equivalent to the normalised rate of *co-presence* and *co-absence* of genes in the positive and negative genome examples respectively:

$$\begin{aligned} \text{sens}(g) &= P(g|\mathbf{G} \in \mathbf{E}_p^+) = \frac{TP}{TP + FN} \\ \text{spec}(g) &= P(\neg g|\mathbf{G} \in \mathbf{E}_p^-) = \frac{TN}{TN + FP} \end{aligned}$$

### Positive (*ppv*) and negative (*npv*) predictive values

The positive predictive values (*ppv*), or precision, measures the proportion of positive genomes present when a gene is present. Similarly, the negative predictive values (*npv*) measured the proportion of negative genomes are absent when a gene is absent.

$$\begin{aligned}ppv(g) &= P(\mathbf{G} \in \mathbf{E}_p^+ | g_i) = \frac{TP}{TP + FP} \\npv(g) &= P(\mathbf{G} \in \mathbf{E}_p^- | -g_i) = \frac{TN}{TN + FN}\end{aligned}$$

### Arithmetic (*amss*) and harmonic (*hmss*) means of sensitivity and specificity

Both scoring functions *amss* and *hmss* balance the rates of co-presence and co-absence. The *amss* scoring function is the arithmetic midpoint between sensitivity and specificity. The *hmss* scoring function, which defines the harmonic mean between the conditional probabilities, is conceptually similar to *amss* but it penalises genes with very low sensitivities or specificities.

$$\begin{aligned}amss(g) &= \frac{1}{2}(sens(g) + spec(g)) \\hmss(g) &= \frac{1}{\frac{1}{sens(g)} + \frac{1}{spec(g)}}\end{aligned}$$

### Odds ratios (*OR*)

The odds ratio compares the odds of a gene present in the positive example versus the odds of a gene absent in the negative examples, such that:

$$OR(g) = \frac{\frac{TP}{FP}}{\frac{FN}{TN}} = \frac{TP \times TN}{FP \times FN}$$

### Chi-square (*chisq*) and directional chi-square (*bchisq*) scoring functions

$\chi^2$  is a frequently-used statistic in testing variations between groups in discrete data. The *chisq* scoring function measured the deviation of the observed frequency from the expected proportion such that:

$$\begin{aligned}chisq(g) &= \sum_{i=1}^n \frac{(O_i - E_i)^2}{E_i} \\&= \sum_{i=1}^2 \sum_{j=1}^2 \frac{(a_{ij} - E(a_{ij}))^2}{E(a_{ij})}\end{aligned}$$

where  $E(a_{ij}) = \frac{(a_{1j}+a_{2j})(a_{i1}+a_{i2})}{a_{11}+a_{21}+a_{12}+a_{22}}$ ,  $a_{ij}$  = elements in the  $2 \times 2$  contingency table.

The directional chi-square function (*bchisq*) is similar to *chisq*, but genes that display an inverse association are reversed to the bottom of the rank. *bchisq* excludes genes that are inversely associated with  $p$ .

$$bchisq(g) = \begin{cases} +chisq(g) & \text{if } OR(g) \geq 1 \\ -chisq(g) & \text{if } OR(g) < 1 \end{cases}$$

### **F-measure ( $F$ )**

F-measure is a frequently used statistic in evaluating performance of information retrieval systems. It is defined as the harmonic mean between the sensitivity and precision, such that:

$$F(g) = \frac{1}{\frac{1}{sens(g)} + \frac{1}{ppv(g)}}$$
