# Supplementary material for: In silico prioritisation of candidate genes for prokaryotic gene function discovery: an application of phylogenetic profiles
Source: Springer Nature journal article supplement (doi:10.1186/1471-2105-10-86), 2009-03-17
Supplement: 12859_2008_2816_MOESM3_ESM.pdf [file 12859_2008_2816_MOESM3_ESM.pdf]

**Table A-3: Peptidoglycan-related genes**

The loci and the validation sets of the peptidoglycan-related genes in Case study 1.

| Gene                                               | Gene product                                                                                                                                 | Validation set  | Genomes            |                  |
|----------------------------------------------------|----------------------------------------------------------------------------------------------------------------------------------------------|-----------------|--------------------|------------------|
|                                                    |                                                                                                                                              |                 | SA-2603            | EC-K12           |
| Peptidoglycan biosynthesis and associated pathways |                                                                                                                                              |                 |                    |                  |
| <i>murA</i>                                        | UDP- <i>N</i> -acetylglucosamine 1-carboxyvinyltransferase                                                                                   | C, B, M         | SAG0843<br>SAG0866 | b3189            |
| <i>murB</i>                                        | UDP- <i>N</i> -acetylmuramate dehydrogenase                                                                                                  | C, B, M         | SAG1112            | b3972            |
| <i>murC</i>                                        | UDP- <i>N</i> -acetylmuramate-alanine ligase                                                                                                 | C, B, M         | SAG1615            | b0091            |
| <i>murD</i>                                        | UDP- <i>N</i> -acetylmuramoylalanine-D-glutamate ligase                                                                                      | C, B, M         | SAG0475            | b0088            |
| <i>murE</i>                                        | UDP- <i>N</i> -acetylmuramoylalanyl-D-glutamate-2,6-diaminopimelate ligase                                                                   | C, B, M         | SAG1391            | b0085            |
| <i>murF</i>                                        | UDP- <i>N</i> -acetylmuramoylalanyl-D-glutamyl-2,6-diaminopimelate-D-alanyl-D-alanine ligase                                                 | C, B, M         | SAG0768            | b0086            |
| <i>mraY</i>                                        | phospho- <i>N</i> -acetylmuramoyl-pentapeptide-transferase                                                                                   | C, B, M         | SAG0288            | b0087            |
| <i>murG</i>                                        | UDP- <i>N</i> -acetylglucosamine- <i>N</i> -acetylmuramyl-(pentapeptide)-pyrophosphoryl-undecaprenol <i>N</i> -acetylglucosamine transferase | C, B, M         | SAG0476            | b0090            |
| UDP- <i>N</i> -acetylmuramate biosynthesis         |                                                                                                                                              |                 |                    |                  |
| <i>glmU</i>                                        | glucosamine-1-phosphate N-acetyltransferase                                                                                                  | UDP- <i>N</i> - | B, M               | SAG1538<br>b3730 |
| <i>glmM</i>                                        | acetylglucosamine pyrophosphorylase                                                                                                          |                 |                    |                  |
| <i>glmM</i>                                        | phosphoglucomutase / phosphomannomutase                                                                                                      |                 | B, M               | SAG0887<br>b3176 |
| <i>glmS</i>                                        | glucosamine-fructose-6-phosphate aminotransferase (isomerizing)                                                                              |                 | B, M               | SAG0944<br>b3729 |
| Undecaprenyl biosynthesis and recycling            |                                                                                                                                              |                 |                    |                  |
| <i>uppP/bacA</i>                                   | undecaprenyl pyrophosphate phosphatase                                                                                                       |                 | B, M               | SAG0138<br>b3057 |

*(Continue on next page)*

Table 1: Peptidoglycan-related genes (continued)

| Gene                              | Gene product                                                   | Validation set | Genomes |                |
|-----------------------------------|----------------------------------------------------------------|----------------|---------|----------------|
|                                   |                                                                |                | SA-2603 | EC-K12         |
| <i>uppS/ispU</i>                  | undecaprenyl diphosphate synthase                              | B, M           | SAG1916 | b0174          |
| D-alanyl-D-alanine metabolism     |                                                                |                |         |                |
| <i>ddl</i>                        | D-alanine-D-alanine ligase                                     | B, M           | SAG0767 | b0381<br>b0092 |
| <i>alr/dadX</i>                   | alanine racemase                                               | B, M           | SAG1684 | b1190<br>b1190 |
| D-glutamate metabolism            |                                                                |                |         |                |
| <i>murI</i>                       | glutamate racemase                                             | B, M           | SAG1600 | b3967          |
| meso-diaminopimelate biosynthesis |                                                                |                |         |                |
| <i>dapF</i>                       | diaminopimelate epimerase                                      | B, M           |         | b3809          |
| <i>dapE</i>                       | N-succinyl-diaminopimelate deacylase                           | B, M           |         | b2472          |
| <i>dapC</i>                       | acetylornithine delta-aminotransferase                         | B, M           |         | b3359          |
| <i>dapD</i>                       | 2,3,4,5-tetrahydropyridine-2-carboxylate N-succinyltransferase | B, M           |         | b0166          |
| <i>dapB</i>                       | dihydrodipicolinate reductase                                  | B, M           |         | b0031          |
| <i>dapA</i>                       | dihydrodipicolinate synthase                                   | B, M           |         | b2478          |
| <i>asd</i>                        | aspartate-semialdehyde dehydrogenase                           | B, M           |         | b3433          |
| <i>lysC</i>                       | aspartokinase                                                  | B, M           |         | b4024          |
| Peptidoglycan modification        |                                                                |                |         |                |
| <i>ami</i>                        | <i>N</i> -acetylmuramoyl-L-alanine amidase                     | M              | SAG0094 |                |

*(Continue on next page)*

Table 1: Peptidoglycan-related genes (continued)

| Gene                        | Gene product                                                                   | Validation set | Genomes |        |
|-----------------------------|--------------------------------------------------------------------------------|----------------|---------|--------|
|                             |                                                                                |                | SA-2603 | EC-K12 |
| <i>amiA</i>                 | <i>N</i> -acetylmuramoyl-L-alanine amidase                                     | M              |         | b2435  |
| <i>amiB</i>                 | <i>N</i> -acetylmuramoyl-L-alanine amidase                                     | M              |         | b4169  |
| <i>amiC</i>                 | <i>N</i> -acetylmuramoyl-L-alanine amidase                                     | M              |         | b2817  |
| <i>ybjR</i>                 | <i>N</i> -acetylmuramoyl-L-alanine amidase                                     | M              |         | b0867  |
| <i>ampD</i>                 | <i>N</i> -acetyl-anhydromuranmyl-L-alanine amidase                             | M              |         | b0110  |
| <i>ampG</i>                 | muropeptide transporter                                                        | M              |         | b0433  |
| <i>mltA</i>                 | membrane-bound lytic murein transglycosylase A                                 | M              |         | b2813  |
| <i>mltB</i>                 | membrane-bound lytic murein transglycosylase B                                 | M              |         | b2701  |
| <i>mltC</i>                 | membrane-bound lytic murein transglycosylase C                                 | M              |         | b2963  |
| <i>mltD</i>                 | membrane-bound lytic murein transglycosylase D (predicted)                     | M              |         | b0211  |
| <i>slt</i>                  | lytic murein transglycosylase, soluble                                         | M              |         | b4392  |
| <i>mepA</i>                 | murein DD-endopeptidase                                                        | M              |         | b2328  |
| <i>glnA</i>                 | glutamine synthetase                                                           | M              | SAG1763 | b3870  |
| <i>mpl</i>                  | UDP- <i>N</i> -acetylmuramate:L-alanyl-gamma-D-glutamyl-diaminopimelate ligase | M              |         | b4233  |
| Penicillin-binding proteins |                                                                                |                |         |        |
| <i>pbp1A</i>                | penicillin-binding protein 1A                                                  | M              | SAG0298 | b3396  |
| <i>pbp1B</i>                | penicillin-binding protein 1B                                                  | M              | SAG0159 |        |
| <i>pbp2/mrdA</i>            | penicillin-binding protein 2                                                   | M              |         | b0635  |
| <i>pbp2A</i>                | penicillin binding protein 2A                                                  | M              | SAG2066 |        |
| <i>pbp2B</i>                | penicillin binding protein 2B                                                  | M              | SAG0765 |        |
| <i>pbp2X</i>                | penicillin binding protein 2X                                                  | M              | SAG0287 |        |

(Continue on next page)

Table 1: Peptidoglycan-related genes (continued)

| Gene             | Gene product                                                         | Validation set | Genomes |        |
|------------------|----------------------------------------------------------------------|----------------|---------|--------|
|                  |                                                                      |                | SA-2603 | EC-K12 |
| <i>pbp3/pbpB</i> | penicillin binding protein 3                                         | M              |         | b0084  |
| <i>ftsI</i>      | carboxy-terminal protease for penicillin-binding protein 3 (EC-K12)  | M              |         | b1830  |
| <i>mrcB</i>      | fused glycosyl transferase and transpeptidase                        | M              |         | b0149  |
| <i>pbp4</i>      | penicillin-binding protein 4                                         | M              | SAG0146 |        |
| <i>pbp5/dacA</i> | penicillin-binding protein 5: D-alanyl-D-alanine carboxypeptidase    | M              |         | b0632  |
| <i>dacC</i>      | penicillin-binding protein 6a/b: D-alanyl-D-alanine carboxypeptidase | M              |         | b0839  |
| <i>dacD</i>      | penicillin-binding protein 6a/b: D-alanyl-D-alanine carboxypeptidase | M              |         | b2010  |
| <i>pbpG</i>      | D-alanyl-D-alanine endopeptidase                                     | M              |         | b2134  |
| <i>pbpC</i>      | transglycosylase/transpeptidase                                      | M              |         | b2519  |
| <i>mtgA</i>      | biosynthetic peptidoglycan transglycosylase                          | M              |         | b3208  |

*(End of table)*
