# Supplementary material for: In silico prioritisation of candidate genes for prokaryotic gene function discovery: an application of phylogenetic profiles
Source: Springer Nature journal article supplement (doi:10.1186/1471-2105-10-86), 2009-03-17
Supplement: 12859_2008_2816_MOESM4_ESM.pdf [file 12859_2008_2816_MOESM4_ESM.pdf]

**Table A-4: Positive and negative genome examples used in the statistical CGP of peptidoglycan-related genes (case study 1)**

This table lists the 400 positive genome examples and 17 negative genome examples in the statistical CGP of peptidoglycan-related genes.

| Genome                                     | Genbank Accession                               |
|--------------------------------------------|-------------------------------------------------|
| Positive genome examples (400)             |                                                 |
| <i>Acidobacteria bacterium</i> Ellin345    | CP000360                                        |
| <i>Acidothermus cellulolyticus</i> 11B     | CP000481                                        |
| <i>Acidovorax</i> JS42                     | CP000539,<br>CP000540,<br>CP000541              |
| <i>Acidovorax avenae citrulli</i> AAC00-1  | CP000512                                        |
| <i>Acinetobacter sp</i> ADP1               | CR543861                                        |
| <i>Aeromonas hydrophila</i> ATCC 7966      | CP000462                                        |
| <i>Agrobacterium tumefaciens</i> C58 UWash | AE008687,<br>AE008688,<br>AE008689,<br>AE008690 |
| <i>Alcanivorax borkumensis</i> SK2         | AM286690                                        |
| <i>Alkalilimnicola ehrlichei</i> MLHE-1    | CP000453                                        |
| <i>Anabaena variabilis</i> ATCC 29413      | CP000117,<br>CP000119,<br>CP000120,<br>CP000121 |
| <i>Anaeromyxobacter dehalogenans</i> 2CP-C | CP000251                                        |
| <i>Aquifex aeolicus</i>                    | AE000657,<br>AE000667                           |
| <i>Arthrobacter</i> FB24                   | CP000454                                        |
| <i>Arthrobacter aureescens</i> TC1         | CP000474,<br>CP000475,<br>CP000476              |
| <i>Azoarcus</i> BH72                       | AM406670                                        |
| <i>Azoarcus sp</i> EbN1                    | CR555306,<br>CR555307,<br>CR555308              |
| <i>Bacillus anthracis</i> Ames             | AE016879                                        |
| <i>Bacillus anthracis</i> Ames 0581        | AE017334,<br>AE017335,<br>AE017336              |
| <i>Bacillus anthracis str</i> Sterne       | AE017225                                        |
| <i>Bacillus cereus</i> ATCC14579           | AE016877,<br>AE016878                           |
| <i>Bacillus cereus</i> ATCC 10987          | AE017194,<br>AE017195                           |

(Continue on next page)

| Genome                                                 | Genbank Accession                                                                                                |
|--------------------------------------------------------|------------------------------------------------------------------------------------------------------------------|
| <i>Bacillus cereus</i> ZK                              | CP000001,<br>CP000040,<br>CP000041,<br>CP000042,<br>CP000043,<br>CP000044                                        |
| <i>Bacillus clausii</i> KSM-K16                        | AP006627                                                                                                         |
| <i>Bacillus halodurans</i>                             | BA000004                                                                                                         |
| <i>Bacillus licheniformis</i> DSM 13                   | AE017333                                                                                                         |
| <i>Bacillus subtilis</i>                               | AL009126                                                                                                         |
| <i>Bacillus thuringiensis</i> Al Hakam                 | CP000485,<br>CP000486                                                                                            |
| <i>Bacillus thuringiensis</i> konkukian                | AE017355,<br>CP000047                                                                                            |
| <i>Bacteroides fragilis</i> NCTC 9434                  | CR626927,<br>CR626928                                                                                            |
| <i>Bacteroides fragilis</i> YCH46                      | AP006841,<br>AP006842                                                                                            |
| <i>Bacteroides thetaiotaomicron</i> VPI-5482           | AE015928,<br>AY171301                                                                                            |
| <i>Bartonella bacilliformis</i> KC583                  | CP000524                                                                                                         |
| <i>Bartonella henselae</i> Houston-1                   | BX897699                                                                                                         |
| <i>Bartonella quintana</i> Toulouse                    | BX897700                                                                                                         |
| <i>Baumannia cicadellinicola</i> Homalodisca coagulata | CP000238                                                                                                         |
| <i>Bdellovibrio bacteriovorus</i>                      | BX842601                                                                                                         |
| <i>Bifidobacterium adolescentis</i> ATCC 15703         | AP009256                                                                                                         |
| <i>Bifidobacterium longum</i>                          | AE014295,<br>AF540971                                                                                            |
| <i>Bordetella bronchiseptica</i>                       | BX470250                                                                                                         |
| <i>Bordetella parapertussis</i>                        | BX470249                                                                                                         |
| <i>Bordetella pertussis</i>                            | BX470248                                                                                                         |
| <i>Borrelia afzelii</i> PKo                            | CP000395,<br>CP000396,<br>CP000397,<br>CP000398,<br>CP000399,<br>CP000400,<br>CP000401,<br>CP000402,<br>CP000403 |

(Continue on next page)

| Genome                                            | Genbank Accession                                                                                                                                                                                                                                                                         |
|---------------------------------------------------|-------------------------------------------------------------------------------------------------------------------------------------------------------------------------------------------------------------------------------------------------------------------------------------------|
| <i>Borrelia burgdorferi</i>                       | AE000784,<br>AE000785,<br>AE000786,<br>AE000787,<br>AE000788,<br>AE000789,<br>AE000790,<br>AE000791,<br>AE000792,<br>AE000793,<br>AE000794,<br>AE001115,<br>AE001575,<br>AE001576,<br>AE001577,<br>AE001578,<br>AE001579,<br>AE001580,<br>AE001581,<br>AE001582,<br>AE001583,<br>AE001584 |
| <i>Borrelia garinii</i> PBi                       | CP000013,<br>CP000014,<br>CP000015                                                                                                                                                                                                                                                        |
| <i>Bradyrhizobium japonicum</i>                   | BA000040                                                                                                                                                                                                                                                                                  |
| <i>Brucella abortus</i> 9-941                     | AE017223,<br>AE017224                                                                                                                                                                                                                                                                     |
| <i>Brucella melitensis</i>                        | AE008917,<br>AE008918                                                                                                                                                                                                                                                                     |
| <i>Brucella melitensis</i> biovar Abortus         | AM040264,<br>AM040265                                                                                                                                                                                                                                                                     |
| <i>Brucella suis</i> 1330                         | AE014291,<br>AE014292                                                                                                                                                                                                                                                                     |
| <i>Buchnera aphidicola</i>                        | AE016826,<br>AF492591                                                                                                                                                                                                                                                                     |
| <i>Buchnera aphidicola</i> Cc <i>Cinara cedri</i> | CP000263                                                                                                                                                                                                                                                                                  |
| <i>Buchnera aphidicola</i> Sg                     | AE013218                                                                                                                                                                                                                                                                                  |
| <i>Buchnera</i> sp                                | AP001070,<br>AP001071,<br>BA000003                                                                                                                                                                                                                                                        |
| <i>Burkholderia</i> 383                           | CP000150,<br>CP000151,<br>CP000152                                                                                                                                                                                                                                                        |
| <i>Burkholderia cenocepacia</i> AU 1054           | CP000378,<br>CP000379,<br>CP000380                                                                                                                                                                                                                                                        |

(Continue on next page)

| Genome                                                       | Genbank Accession                               |
|--------------------------------------------------------------|-------------------------------------------------|
| <i>Burkholderia cenocepacia</i> HI2424                       | CP000458,<br>CP000459,<br>CP000460,<br>CP000461 |
| <i>Burkholderia cepacia</i> AMMD                             | CP000440,<br>CP000441,<br>CP000442,<br>CP000443 |
| <i>Burkholderia mallei</i> ATCC 23344                        | CP000010,<br>CP000011                           |
| <i>Burkholderia mallei</i> NCTC 10229                        | CP000545,<br>CP000546                           |
| <i>Burkholderia mallei</i> SAVP1                             | CP000525,<br>CP000526                           |
| <i>Burkholderia pseudomallei</i> 1710b                       | CP000124,<br>CP000125                           |
| <i>Burkholderia pseudomallei</i> K96243                      | BX571965,<br>BX571966                           |
| <i>Burkholderia thailandensis</i> E264                       | CP000085,<br>CP000086                           |
| <i>Burkholderia xenovorans</i> LB400                         | CP000270,<br>CP000271,<br>CP000272              |
| <i>Campylobacter fetus</i> 82-40                             | CP000487                                        |
| <i>Campylobacter jejuni</i>                                  | AL111168                                        |
| <i>Campylobacter jejuni</i> RM1221                           | CP000025                                        |
| <i>Candidatus</i> Blochmannia floridanus                     | BX248583                                        |
| <i>Candidatus</i> Blochmannia pennsylvanicus BPEN            | CP000016                                        |
| <i>Candidatus</i> Carsonella ruddii                          | AP009180                                        |
| <i>Candidatus</i> Pelagibacter ubique HTCC1062               | CP000084                                        |
| <i>Candidatus</i> Ruthia magnifica Cm Calyptogenia magnifica | CP000488                                        |
| <i>Carboxydotherrmus hydrogenoformans</i> Z-2901             | CP000141                                        |
| <i>Caulobacter crescentus</i>                                | AE005673                                        |
| <i>Chlamydia muridarum</i>                                   | AE002160,<br>AE002162                           |
| <i>Chlamydia trachomatis</i>                                 | AE001273                                        |
| <i>Chlamydia trachomatis</i> A HAR-13                        | CP000051,<br>CP000052                           |
| <i>Chlamydophila abortus</i> S26 3                           | CR848038                                        |
| <i>Chlamydophila caviae</i>                                  | AE015925,<br>AE015926                           |
| <i>Chlamydophila felis</i> Fe C-56                           | AP006861,<br>AP006862                           |
| <i>Chlamydophila pneumoniae</i> AR39                         | AE002161                                        |
| <i>Chlamydophila pneumoniae</i> CWL029                       | AE001363                                        |
| <i>Chlamydophila pneumoniae</i> J138                         | BA000008                                        |
| <i>Chlamydophila pneumoniae</i> TW 183                       | AE009440                                        |

(Continue on next page)

| Genome                                                 | Genbank Accession                               |
|--------------------------------------------------------|-------------------------------------------------|
| <i>Chlorobium chlorochromatii</i> CaD3                 | CP000108                                        |
| <i>Chlorobium phaeobacteroides</i> DSM 266             | CP000492                                        |
| <i>Chlorobium tepidum</i> TLS                          | AE006470                                        |
| <i>Chromobacterium violaceum</i>                       | AE016825                                        |
| <i>Chromohalobacter salexigens</i> DSM 3043            | CP000285                                        |
| <i>Clostridium acetobutylicum</i>                      | AE001437,<br>AE001438                           |
| <i>Clostridium novyi</i> NT                            | CP000382                                        |
| <i>Clostridium perfringens</i>                         | AP003515,<br>BA000016                           |
| <i>Clostridium perfringens</i> ATCC 13124              | CP000246                                        |
| <i>Clostridium perfringens</i> SM101                   | CP000312,<br>CP000313,<br>CP000314,<br>CP000315 |
| <i>Clostridium tetani</i> E88                          | AE015927,<br>AF528097                           |
| <i>Clostridium thermocellum</i> ATCC 27405             |                                                 |
| <i>Colwellia psychrerythraea</i> 34H                   | CP000083                                        |
| <i>Corynebacterium diphtheriae</i>                     | BX248353                                        |
| <i>Corynebacterium efficiens</i> YS-314                | BA000035                                        |
| <i>Corynebacterium glutamicum</i> ATCC 13032 Bielefeld | BX927147                                        |
| <i>Corynebacterium jeikeium</i> K411                   | AF401314,<br>CR931997                           |
| <i>Coxiella burnetii</i>                               | AE016828,<br>AE016829                           |
| <i>Cyanobacteria bacterium</i> Yellowstone A-Prime     | CP000239                                        |
| <i>Cyanobacteria bacterium</i> Yellowstone B-Prime     | CP000240                                        |
| <i>Cytophaga hutchinsonii</i> ATCC 33406               | CP000383                                        |
| <i>Dechloromonas aromatica</i> RCB                     | CP000089                                        |
| <i>Dehalococcoides</i> CBDB1                           | AJ965256                                        |
| <i>Dehalococcoides ethenogenes</i> 195                 | CP000027                                        |
| <i>Deinococcus geothermalis</i> DSM 11300              | CP000358,<br>CP000359                           |
| <i>Deinococcus radiodurans</i>                         | AE000513,<br>AE001825,<br>AE001826,<br>AE001827 |
| <i>Desulfitobacterium hafniense</i> Y51                | AP008230                                        |
| <i>Desulfotalea psychrophila</i> Lsv54                 | CR522870,<br>CR522871,<br>CR522872              |
| <i>Desulfovibrio desulfuricans</i> G20                 | CP000112                                        |
| <i>Desulfovibrio vulgaris</i> DP4                      | CP000527,<br>CP000528                           |
| <i>Desulfovibrio vulgaris</i> Hildenborough            | AE017285,<br>AE017286                           |

(Continue on next page)

| Genome                                         | Genbank Accession                                                         |
|------------------------------------------------|---------------------------------------------------------------------------|
| <i>Ehrlichia canis</i> Jake                    | CP000107                                                                  |
| <i>Ehrlichia chaffeensis</i> Arkansas          | CP000236                                                                  |
| <i>Ehrlichia ruminantium</i> Gardel            | CR925677                                                                  |
| <i>Ehrlichia ruminantium str.</i> Welgevonden  | CR925678                                                                  |
| <i>Enterococcus faecalis</i> V583              | AE016830,<br>AE016831,<br>AE016832,<br>AE016833                           |
| <i>Erwinia carotovora atroseptica</i> SCRI1043 | BX950851                                                                  |
| <i>Erythrobacter litoralis</i> HTCC2594        | CP000157                                                                  |
| <i>Escherichia coli</i> 536                    | CP000247                                                                  |
| <i>Escherichia coli</i> APEC O1                | CP000468                                                                  |
| <i>Escherichia coli</i> CFT073                 | AE014075                                                                  |
| <i>Escherichia coli</i> K12                    | U00096                                                                    |
| <i>Escherichia coli</i> O157H7                 | AB011548,<br>AB011549,<br>BA000007                                        |
| <i>Escherichia coli</i> O157H7 EDL933          | AE005174,<br>AF074613                                                     |
| <i>Escherichia coli</i> UTI89                  | CP000243,<br>CP000244                                                     |
| <i>Escherichia coli</i> W3110                  |                                                                           |
| <i>Francisella tularensis</i> FSC 198          | AM286280                                                                  |
| <i>Francisella tularensis holarctica</i>       | AM233362                                                                  |
| <i>Francisella tularensis holarctica</i> OSU18 | CP000437                                                                  |
| <i>Francisella tularensis novicida</i> U112    | CP000439                                                                  |
| <i>Francisella tularensis tularensis</i>       | AJ749949                                                                  |
| <i>Frankia</i> CcI3                            | CP000249                                                                  |
| <i>Frankia alni</i> ACN14a                     | CT573213                                                                  |
| <i>Fusobacterium nucleatum</i>                 | AE009951                                                                  |
| <i>Geobacillus kaustophilus</i> HTA426         | AP006520,<br>BA000043                                                     |
| <i>Geobacter metallireducens</i> GS-15         | CP000148,<br>CP000149                                                     |
| <i>Geobacter sulfurreducens</i>                | AE017180                                                                  |
| <i>Gloeobacter violaceus</i>                   | BA000045                                                                  |
| <i>Gluconobacter oxydans</i> 621H              | CP000004,<br>CP000005,<br>CP000006,<br>CP000007,<br>CP000008,<br>CP000009 |
| <i>Gramella forsetii</i> KT0803                | CU207366                                                                  |
| <i>Granulobacter bethesdensis</i> CGDNIH1      | CP000394                                                                  |
| <i>Haemophilus ducreyi</i> 35000HP             | AE017143                                                                  |
| <i>Haemophilus influenzae</i>                  |                                                                           |
| <i>Haemophilus influenzae</i> 86 028NP         | CP000057                                                                  |

(Continue on next page)

| Genome                                                   | Genbank Accession                                                         |
|----------------------------------------------------------|---------------------------------------------------------------------------|
| <i>Haemophilus somnus</i> 129PT                          | CP000019,<br>CP000436                                                     |
| <i>Hahella chejuensis</i> KCTC 2396                      | CP000155                                                                  |
| <i>Halorhodospira halophila</i> SL1                      | CP000544                                                                  |
| <i>Helicobacter acinonychis</i> Sheeba                   | AM260522,<br>AM260523                                                     |
| <i>Helicobacter hepaticus</i>                            | AE017125                                                                  |
| <i>Helicobacter pylori</i> 26695                         | AE000511                                                                  |
| <i>Helicobacter pylori</i> HPAG1                         | CP000241,<br>CP000242                                                     |
| <i>Helicobacter pylori</i> J99                           | AE001439                                                                  |
| <i>Hyphomonas neptunium</i> ATCC 15444                   | CP000158                                                                  |
| <i>Idiomarina loihiensis</i> L2TR                        | AE017340                                                                  |
| <i>Jannaschia</i> CCS1                                   | CP000264,<br>CP000265                                                     |
| <i>Lactobacillus acidophilus</i> NCFM                    | CP000033                                                                  |
| <i>Lactobacillus brevis</i> ATCC 367                     | CP000416,<br>CP000417,<br>CP000418                                        |
| <i>Lactobacillus casei</i> ATCC 334                      | CP000423,<br>CP000424                                                     |
| <i>Lactobacillus delbrueckii bulgaricus</i>              | CR954253                                                                  |
| <i>Lactobacillus delbrueckii bulgaricus</i> ATCC BAA-365 | CP000412                                                                  |
| <i>Lactobacillus gasseri</i> ATCC 33323                  | CP000413                                                                  |
| <i>Lactobacillus johnsonii</i> NCC 533                   | AE017198                                                                  |
| <i>Lactobacillus plantarum</i>                           | AL935263,<br>CR377164,<br>CR377165,<br>CR377166                           |
| <i>Lactobacillus sakei</i> 23K                           | CR936503                                                                  |
| <i>Lactobacillus salivarius</i> UCC118                   | AF488831,<br>AF488832,<br>CP000233,<br>CP000234                           |
| <i>Lactococcus lactis</i>                                | AE005176                                                                  |
| <i>Lactococcus lactis cremoris</i> MG1363                | AM406671                                                                  |
| <i>Lactococcus lactis cremoris</i> SK11                  | CP000425,<br>CP000426,<br>CP000427,<br>CP000428,<br>CP000429,<br>CP000430 |
| <i>Lawsonia intracellularis</i> PHE MN1-00               | AM180252,<br>AM180253,<br>AM180254,<br>AM180255                           |

(Continue on next page)

| Genome                                                      | Genbank Accession                               |
|-------------------------------------------------------------|-------------------------------------------------|
| <i>Legionella pneumophila</i> Lens                          | CR628337,<br>CR628339                           |
| <i>Legionella pneumophila</i> Paris                         | CR628336,<br>CR628338                           |
| <i>Legionella pneumophila</i> Philadelphia 1                | AE017354                                        |
| <i>Leifsonia xyli xyli</i> CTCB0                            | AE016822                                        |
| <i>Leptospira borgpetersenii</i> serovar Hardjo-bovis JB197 | CP000350,<br>CP000351                           |
| <i>Leptospira borgpetersenii</i> serovar Hardjo-bovis L550  | CP000348,<br>CP000349                           |
| <i>Leptospira interrogans</i> serovar Copenhageni           | AE016823,<br>AE016824                           |
| <i>Leptospira interrogans</i> serovar Lai                   | AE010300,<br>AE010301                           |
| <i>Leuconostoc mesenteroides</i> ATCC 8293                  | CP000414,<br>CP000415                           |
| <i>Listeria innocua</i>                                     | AL592022,<br>AL592102                           |
| <i>Listeria monocytogenes</i>                               | AL591824                                        |
| <i>Listeria monocytogenes</i> 4b F2365                      | AE017262                                        |
| <i>Listeria welshimeri</i> serovar 6b SLCC5334              | AM263198                                        |
| <i>Magnetococcus</i> MC-1                                   | CP000471                                        |
| <i>Magnetospirillum magneticum</i> AMB-1                    | AP007255                                        |
| <i>Mannheimia succiniciproducens</i> MBEL55E                | AE016827                                        |
| <i>Maricaulis maris</i> MCS10                               | CP000449                                        |
| <i>Marinobacter aquaeolei</i> VT8                           |                                                 |
| <i>Mesorhizobium</i> BNC1                                   | CP000389,<br>CP000390,<br>CP000391,<br>CP000392 |
| <i>Mesorhizobium loti</i>                                   | AP003017,<br>BA000012,<br>BA000013              |
| <i>Methylibium petroleiphilum</i> PM1                       | CP000555,<br>CP000556                           |
| <i>Methylobacillus flagellatus</i> KT                       | CP000284                                        |
| <i>Methylococcus capsulatus</i> Bath                        | AE017282                                        |
| <i>Moorella thermoacetica</i> ATCC 39073                    | CP000232                                        |
| <i>Mycobacterium</i> KMS                                    | CP000518,<br>CP000519,<br>CP000520              |
| <i>Mycobacterium</i> MCS                                    | CP000384,<br>CP000385                           |
| <i>Mycobacterium avium</i> 104                              | CP000479                                        |
| <i>Mycobacterium avium</i> paratuberculosis                 | AE016958                                        |
| <i>Mycobacterium bovis</i>                                  | BX248333                                        |
| <i>Mycobacterium bovis</i> BCG Pasteur 1173P2               | AM408590                                        |

(Continue on next page)



| Genome                                           | Genbank Accession                                                                      |
|--------------------------------------------------|----------------------------------------------------------------------------------------|
| <i>Mycobacterium leprae</i>                      | AL450380                                                                               |
| <i>Mycobacterium smegmatis</i> MC2 155           | CP000480                                                                               |
| <i>Mycobacterium tuberculosis</i> CDC1551        | AE000516                                                                               |
| <i>Mycobacterium tuberculosis</i> H37Rv          | AL123456                                                                               |
| <i>Mycobacterium ulcerans</i> Agy99              | CP000325                                                                               |
| <i>Mycobacterium vanbaalenii</i> PYR-1           | CP000511                                                                               |
| <i>Myrococcus xanthus</i> DK 1622                | CP000113                                                                               |
| <i>Neisseria gonorrhoeae</i> FA 1090             | AE004969                                                                               |
| <i>Neisseria meningitidis</i> FAM18              | AM421808                                                                               |
| <i>Neisseria meningitidis</i> MC58               | AE002098                                                                               |
| <i>Neisseria meningitidis</i> Z2491              | AL157959                                                                               |
| <i>Neorickettsia sennetsu</i> Miyayama           | CP000237                                                                               |
| <i>Nitrobacter hamburgensis</i> X14              | CP000319,<br>CP000320,<br>CP000321,<br>CP000322                                        |
| <i>Nitrobacter winogradskyi</i> Nb-255           | CP000115                                                                               |
| <i>Nitrosococcus oceani</i> ATCC 19707           | CP000126,<br>CP000127                                                                  |
| <i>Nitrosomonas europaea</i>                     | AL954747                                                                               |
| <i>Nitrosomonas eutropha</i> C71                 | CP000450,<br>CP000451,<br>CP000452                                                     |
| <i>Nitrospira multififormis</i> ATCC 25196       | CP000103,<br>CP000104,<br>CP000105,<br>CP000106                                        |
| <i>Nocardia farcinica</i> IFM10152               | AP006618,<br>AP006619,<br>AP006620                                                     |
| <i>Nocardioides</i> JS614                        | CP000508,<br>CP000509                                                                  |
| <i>Nostoc</i> sp                                 | AP003602,<br>AP003603,<br>AP003604,<br>AP003605,<br>AP003606,<br>BA000019,<br>BA000020 |
| <i>Novosphingobium aromaticivorans</i> DSM 12444 | CP000248                                                                               |
| <i>Oceanobacillus ihayensis</i>                  | BA000028                                                                               |
| <i>Oenococcus oeni</i> PSU-1                     | CP000411                                                                               |
| <i>Parachlamydia</i> sp UWE25                    | BX908798                                                                               |
| <i>Paracoccus denitrificans</i> PD1222           | CP000489,<br>CP000490,<br>CP000491                                                     |
| <i>Pasteurella multocida</i>                     | AE004439                                                                               |

(Continue on next page)

| Genome                                         | Genbank Accession                                                                                                |
|------------------------------------------------|------------------------------------------------------------------------------------------------------------------|
| <i>Pediococcus pentosaceus</i> ATCC 25745      | CP000422                                                                                                         |
| <i>Pelobacter carbinolicus</i>                 | CP000142                                                                                                         |
| <i>Pelobacter propionicus</i> DSM 2379         | CP000482,<br>CP000483,<br>CP000484                                                                               |
| <i>Pelodictyon luteolum</i> DSM 273            | CP000096                                                                                                         |
| <i>Photobacterium profundum</i> SS9            | CR354531,<br>CR354532,<br>CR377818                                                                               |
| <i>Photorhabdus luminescens</i>                | BX470251                                                                                                         |
| <i>Pirellula</i> sp                            | BX119912                                                                                                         |
| <i>Polaromonas</i> JS666                       | CP000316,<br>CP000317,<br>CP000318                                                                               |
| <i>Polaromonas naphthalenivorans</i> CJ2       | CP000529,<br>CP000530,<br>CP000531,<br>CP000532,<br>CP000533,<br>CP000534,<br>CP000535,<br>CP000536,<br>CP000537 |
| <i>Porphyromonas gingivalis</i> W83            | AE015924                                                                                                         |
| <i>Prochlorococcus marinus</i> AS9601          | CP000551                                                                                                         |
| <i>Prochlorococcus marinus</i> CCMP1375        | AE017126                                                                                                         |
| <i>Prochlorococcus marinus</i> MED4            | BX548174                                                                                                         |
| <i>Prochlorococcus marinus</i> MIT9313         | BX548175                                                                                                         |
| <i>Prochlorococcus marinus</i> MIT 9303        | CP000554                                                                                                         |
| <i>Prochlorococcus marinus</i> MIT 9312        | CP000111                                                                                                         |
| <i>Prochlorococcus marinus</i> MIT 9515        | CP000552                                                                                                         |
| <i>Prochlorococcus marinus</i> NATL1A          | CP000553                                                                                                         |
| <i>Prochlorococcus marinus</i> NATL2A          | CP000095                                                                                                         |
| <i>Propionibacterium acnes</i> KPA171202       | AE017283                                                                                                         |
| <i>Pseudoalteromonas atlantica</i> T6c         | CP000388                                                                                                         |
| <i>Pseudoalteromonas haloplanktis</i> TAC125   | CR954246,<br>CR954247                                                                                            |
| <i>Pseudomonas aeruginosa</i>                  | AE004091                                                                                                         |
| <i>Pseudomonas aeruginosa</i> UCBPP-PA14       | CP000438                                                                                                         |
| <i>Pseudomonas entomophila</i> L48             | CT573326                                                                                                         |
| <i>Pseudomonas fluorescens</i> Pf-5            | CP000076                                                                                                         |
| <i>Pseudomonas fluorescens</i> PfO-1           | CP000094                                                                                                         |
| <i>Pseudomonas putida</i> KT2440               | AE015451                                                                                                         |
| <i>Pseudomonas syringae phaseolicola</i> 1448A | CP000058,<br>CP000059,<br>CP000060                                                                               |
| <i>Pseudomonas syringae</i> pv B728a           | CP000075                                                                                                         |

(Continue on next page)

| Genome                                               | Genbank Accession                                                                      |
|------------------------------------------------------|----------------------------------------------------------------------------------------|
| <i>Pseudomonas syringae</i> tomato DC3000            | AE016853,<br>AE016854,<br>AE016855                                                     |
| <i>Psychrobacter arcticum</i> 273-4                  | CP000082                                                                               |
| <i>Psychrobacter cryohalolentis</i> K5               | CP000323,<br>CP000324                                                                  |
| <i>Psychromonas ingrahamii</i> 37                    | CP000510                                                                               |
| <i>Ralstonia eutropha</i> H16                        | AM260479,<br>AM260480                                                                  |
| <i>Ralstonia eutropha</i> JMP134                     | CP000090,<br>CP000091,<br>CP000092,<br>CP000093                                        |
| <i>Ralstonia metallidurans</i> CH34                  | CP000352,<br>CP000353,<br>CP000354,<br>CP000355                                        |
| <i>Ralstonia solanacearum</i>                        | AL646052,<br>AL646053                                                                  |
| <i>Rhizobium etli</i> CFN 42                         | CP000133,<br>CP000134,<br>CP000135,<br>CP000136,<br>CP000137,<br>CP000138              |
| <i>Rhizobium leguminosarum</i> bv <i>viciae</i> 3841 | AM236080,<br>AM236081,<br>AM236082,<br>AM236083,<br>AM236084,<br>AM236085,<br>AM236086 |
| <i>Rhodobacter sphaeroides</i> 2 4 1                 | CP000143,<br>CP000144,<br>CP000145,<br>CP000146,<br>CP000147,<br>DQ232586,<br>DQ232587 |
| <i>Rhodococcus</i> RHA1                              | CP000431,<br>CP000432,<br>CP000433,<br>CP000434                                        |
| <i>Rhodoferax ferrireducens</i> T118                 | CP000267,<br>CP000268                                                                  |
| <i>Rhodopseudomonas palustris</i> BisA53             | CP000463                                                                               |
| <i>Rhodopseudomonas palustris</i> BisB18             | CP000301                                                                               |

(Continue on next page)

| Genome                                         | Genbank Accession                                            |
|------------------------------------------------|--------------------------------------------------------------|
| <i>Rhodopseudomonas palustris</i> BisB5        | CP000283                                                     |
| <i>Rhodopseudomonas palustris</i> CGA009       | BX571963,<br>BX571964                                        |
| <i>Rhodopseudomonas palustris</i> HaA2         | CP000250                                                     |
| <i>Rhodospirillum rubrum</i> ATCC 11170        | CP000230,<br>CP000231                                        |
| <i>Rickettsia bellii</i> RML369-C              | CP000087                                                     |
| <i>Rickettsia conorii</i>                      | AE006914                                                     |
| <i>Rickettsia felis</i> URRWXCal2              | CP000053,<br>CP000054,<br>CP000055                           |
| <i>Rickettsia prowazekii</i>                   | AJ235269                                                     |
| <i>Rickettsia typhi wilmington</i>             | AE017197                                                     |
| <i>Roseobacter denitrificans</i> OCh 114       | CP000362,<br>CP000464,<br>CP000465,<br>CP000466,<br>CP000467 |
| <i>Rubrobacter xylanophilus</i> DSM 9941       | CP000386                                                     |
| <i>Saccharophagus degradans</i> 2-40           | CP000282                                                     |
| <i>Salinibacter ruber</i> DSM 13855            | CP000159,<br>CP000160                                        |
| <i>Salmonella enterica</i> Choleraesuis        | AE017220,<br>AY509003,<br>AY509004                           |
| <i>Salmonella enterica</i> Paratyphi ATCC 9150 | CP000026                                                     |
| <i>Salmonella typhi</i>                        | AL513382,<br>AL513383,<br>AL513384                           |
| <i>Salmonella typhi</i> Ty2                    | AE014613                                                     |
| <i>Salmonella typhimurium</i> LT2              | AE006468,<br>AE006471                                        |
| <i>Shewanella</i> ANA-3                        | CP000469,<br>CP000470                                        |
| <i>Shewanella</i> MR-4                         | CP000446                                                     |
| <i>Shewanella</i> MR-7                         | CP000444,<br>CP000445                                        |
| <i>Shewanella</i> W3-18-1                      | CP000503                                                     |
| <i>Shewanella amazonensis</i> SB2B             | CP000507                                                     |
| <i>Shewanella denitrificans</i> OS217          | CP000302                                                     |
| <i>Shewanella frigidimarina</i> NCIMB 400      | CP000447                                                     |
| <i>Shewanella oneidensis</i>                   | AE014299,<br>AE014300                                        |
| <i>Shigella boydii</i> Sb227                   | CP000036,<br>CP000037                                        |
| <i>Shigella dysenteriae</i>                    | CP000034,<br>CP000035                                        |

(Continue on next page)

| Genome                                       | Genbank Accession                                                                      |
|----------------------------------------------|----------------------------------------------------------------------------------------|
| <i>Shigella flexneri</i> 2a                  | AE005674,<br>AF386526                                                                  |
| <i>Shigella flexneri</i> 2a 2457T            | AE014073                                                                               |
| <i>Shigella flexneri</i> 5 8401              | CP000266                                                                               |
| <i>Shigella sonnei</i> Ss046                 | CP000038,<br>CP000039                                                                  |
| <i>Silicibacter</i> TM1040                   | CP000375,<br>CP000376,<br>CP000377                                                     |
| <i>Silicibacter pomeroyi</i> DSS-3           | CP000031,<br>CP000032                                                                  |
| <i>Sinorhizobium meliloti</i>                | AE006469,<br>AL591688,<br>AL591985                                                     |
| <i>Sodalis glossinidius morsitans</i>        | AP008232,<br>AP008233,<br>AP008234,<br>AP008235                                        |
| <i>Solibacter usitatus</i> Ellin6076         | CP000473                                                                               |
| <i>Sphingopyxis alaskensis</i> RB2256        | CP000356,<br>CP000357                                                                  |
| <i>Staphylococcus aureus</i> COL             | CP000045,<br>CP000046                                                                  |
| <i>Staphylococcus aureus</i> MW2             | BA000033                                                                               |
| <i>Staphylococcus aureus</i> Mu50            | AP003367,<br>BA000017                                                                  |
| <i>Staphylococcus aureus</i> N315            | AP003139,<br>BA000018                                                                  |
| <i>Staphylococcus aureus</i> NCTC 8325       | CP000253                                                                               |
| <i>Staphylococcus aureus</i> RF122           | AJ938182                                                                               |
| <i>Staphylococcus aureus</i> USA300          | CP000255,<br>CP000256,<br>CP000257,<br>CP000258                                        |
| <i>Staphylococcus aureus aureus</i> MRSA252  | BX571856                                                                               |
| <i>Staphylococcus aureus aureus</i> MSSA476  | BX571857,<br>BX571858                                                                  |
| <i>Staphylococcus epidermidis</i> ATCC 12228 | AE015929,<br>AE015930,<br>AE015931,<br>AE015932,<br>AE015933,<br>AE015934,<br>AE015935 |
| <i>Staphylococcus epidermidis</i> RP62A      | CP000028,<br>CP000029                                                                  |
| <i>Staphylococcus haemolyticus</i>           | AP006716                                                                               |

(Continue on next page)

| Genome                                       | Genbank Accession                                            |
|----------------------------------------------|--------------------------------------------------------------|
| <i>Staphylococcus saprophyticus</i>          | AP008934,<br>AP008935,<br>AP008936                           |
| <i>Streptococcus agalactiae</i> 2603         | AE009948                                                     |
| <i>Streptococcus agalactiae</i> A909         | CP000114                                                     |
| <i>Streptococcus agalactiae</i> NEM316       | AL732656                                                     |
| <i>Streptococcus mutans</i>                  | AE014133                                                     |
| <i>Streptococcus pneumoniae</i> D39          | CP000410                                                     |
| <i>Streptococcus pneumoniae</i> R6           | AE007317                                                     |
| <i>Streptococcus pyogenes</i> M1 GAS         | AE004092                                                     |
| <i>Streptococcus pyogenes</i> MGAS10270      | CP000260                                                     |
| <i>Streptococcus pyogenes</i> MGAS10394      | CP000003                                                     |
| <i>Streptococcus pyogenes</i> MGAS10750      | CP000262                                                     |
| <i>Streptococcus pyogenes</i> MGAS2096       | CP000261                                                     |
| <i>Streptococcus pyogenes</i> MGAS315        | AE014074                                                     |
| <i>Streptococcus pyogenes</i> MGAS5005       | CP000017                                                     |
| <i>Streptococcus pyogenes</i> MGAS6180       | CP000056                                                     |
| <i>Streptococcus pyogenes</i> MGAS8232       | AE009949                                                     |
| <i>Streptococcus pyogenes</i> MGAS9429       | CP000259                                                     |
| <i>Streptococcus pyogenes</i> SSI-1          | BA000034                                                     |
| <i>Streptococcus sanguinis</i> SK36          |                                                              |
| <i>Streptococcus thermophilus</i> CNRZ1066   | CP000024                                                     |
| <i>Streptococcus thermophilus</i> LMD-9      | CP000419,<br>CP000420,<br>CP000421                           |
| <i>Streptococcus thermophilus</i> LMG 18311  | CP000023                                                     |
| <i>Streptomyces avermitilis</i>              | AP005645,<br>BA000030                                        |
| <i>Streptomyces coelicolor</i>               | AL589148,<br>AL645771,<br>AL645882                           |
| <i>Symbiobacterium thermophilum</i> IAM14863 | AP006840                                                     |
| <i>Synechococcus</i> CC9311                  | CP000435                                                     |
| <i>Synechococcus</i> CC9605                  | CP000110                                                     |
| <i>Synechococcus</i> CC9902                  | CP000097                                                     |
| <i>Synechococcus elongatus</i> PCC 6301      | AP008231                                                     |
| <i>Synechococcus elongatus</i> PCC 7942      | CP000100,<br>CP000101                                        |
| <i>Synechococcus</i> sp WH8102               | BX548020                                                     |
| <i>Synechocystis</i> PCC6803                 | AP004310,<br>AP004311,<br>AP004312,<br>AP006585,<br>BA000022 |
| <i>Syntrophobacter fumaroxidans</i> MPOB     | CP000478                                                     |
| <i>Syntrophomonas wolfei</i> Goettingen      | CP000448                                                     |
| <i>Syntrophus aciditrophicus</i> SB          | CP000252                                                     |

(Continue on next page)

| Genome                                                   | Genbank Accession                                            |
|----------------------------------------------------------|--------------------------------------------------------------|
| <i>Thermoanaerobacter tengcongensis</i>                  | AE008691                                                     |
| <i>Thermobifida fusca</i> YX                             | CP000088                                                     |
| <i>Thermosynechococcus elongatus</i>                     | BA000039                                                     |
| <i>Thermotoga maritima</i>                               | AE000512                                                     |
| <i>Thermus thermophilus</i> HB27                         | AE017221,<br>AE017222                                        |
| <i>Thermus thermophilus</i> HB8                          | AP008226,<br>AP008227,<br>AP008228                           |
| <i>Thiobacillus denitrificans</i> ATCC 25259             | CP000116                                                     |
| <i>Thiomicrospira crunogena</i> XCL-2                    | CP000109                                                     |
| <i>Thiomicrospira denitrificans</i> ATCC 33889           | CP000153                                                     |
| <i>Treponema denticola</i> ATCC 35405                    | AE017226                                                     |
| <i>Treponema pallidum</i>                                | AE000520                                                     |
| <i>Trichodesmium erythraeum</i> IMS101                   | CP000393                                                     |
| <i>Tropheryma whippelii</i> TW08 27                      | BX072543                                                     |
| <i>Tropheryma whippelii</i> Twist                        | AE014184                                                     |
| <i>Verminephrobacter eiseniae</i> EF01-2                 | CP000542,<br>CP000543                                        |
| <i>Vibrio cholerae</i>                                   | AE003852,<br>AE003853                                        |
| <i>Vibrio fischeri</i> ES114                             | CP000020,<br>CP000021,<br>CP000022                           |
| <i>Vibrio parahaemolyticus</i>                           | BA000031,<br>BA000032                                        |
| <i>Vibrio vulnificus</i> CMCP6                           | AE016795,<br>AE016796                                        |
| <i>Vibrio vulnificus</i> YJ016                           | AP005352,<br>BA000037,<br>BA000038                           |
| <i>Wigglesworthia brevialpis</i>                         | AB063523,<br>BA000021                                        |
| <i>Wolbachia endosymbiont of</i> Brugia malayi TRS       | AE017321                                                     |
| <i>Wolbachia endosymbiont of</i> Drosophila melanogaster | AE017196                                                     |
| <i>Wolinella succinogenes</i>                            | BX571656                                                     |
| <i>Xanthomonas campestris</i>                            | AE008922                                                     |
| <i>Xanthomonas campestris</i> 8004                       | CP000050                                                     |
| <i>Xanthomonas campestris vesicatoria</i> 85-10          | AM039948,<br>AM039949,<br>AM039950,<br>AM039951,<br>AM039952 |
| <i>Xanthomonas citri</i>                                 | AE008923,<br>AE008924,<br>AE008925                           |
| <i>Xanthomonas oryzae</i> KACC10331                      |                                                              |

(Continue on next page)

| Genome                                              | Genbank Accession                                            |
|-----------------------------------------------------|--------------------------------------------------------------|
| <i>Xanthomonas oryzae</i> MAFF 311018               | AP008229                                                     |
| <i>Xylella fastidiosa</i>                           | AE003849,<br>AE003850,<br>AE003851                           |
| <i>Xylella fastidiosa</i> Temecula1                 | AE009442,<br>AE009443                                        |
| <i>Yersinia enterocolitica</i> 8081                 |                                                              |
| <i>Yersinia pestis</i> Antiqua                      | CP000308,<br>CP000309,<br>CP000310,<br>CP000311              |
| <i>Yersinia pestis</i> CO92                         | AL109969,<br>AL117189,<br>AL117211,<br>AL590842              |
| <i>Yersinia pestis</i> KIM                          | AE009952,<br>AF074611                                        |
| <i>Yersinia pestis</i> Nepal516                     | CP000305,<br>CP000306,<br>CP000307                           |
| <i>Yersinia pestis</i> biovar Mediaevails           | AE017042,<br>AE017043,<br>AE017044,<br>AE017045,<br>AE017046 |
| <i>Yersinia pseudotuberculosis</i> IP32953          | BX936398,<br>BX936399,<br>BX936400                           |
| <i>Zymomonas mobilis</i> ZM4                        | AE008692                                                     |
| Negative genome examples (17)                       |                                                              |
| <i>Anaplasma marginale</i> St Maries                | CP000030                                                     |
| <i>Anaplasma phagocytophilum</i> HZ                 | CP000235                                                     |
| <i>Aster yellows witches-broom phytoplasma</i> AYWB | CP000061,<br>CP000062,<br>CP000063,<br>CP000064,<br>CP000065 |
| <i>Mesoplasma florum</i> L1                         | AE017263                                                     |
| <i>Mycoplasma capricolum</i> ATCC 27343             | CP000123                                                     |
| <i>Mycoplasma gallisepticum</i>                     | AE015450                                                     |
| <i>Mycoplasma hyopneumoniae</i> 232                 | AE017332                                                     |
| <i>Mycoplasma hyopneumoniae</i> 7448                | AE017244                                                     |
| <i>Mycoplasma hyopneumoniae</i> J                   | AE017243                                                     |
| <i>Mycoplasma mobile</i> 163K                       | AE017308                                                     |
| <i>Mycoplasma mycoides</i>                          | BX293980                                                     |
| <i>Mycoplasma penetrans</i>                         | BA000026                                                     |
| <i>Mycoplasma pneumoniae</i>                        | U00089                                                       |

(Continue on next page)



| Genome                           | Genbank Accession |
|----------------------------------|-------------------|
| <i>Mycoplasma pulmonis</i>       | AL445566          |
| <i>Mycoplasma synoviae</i> 53    | AE017245          |
| <i>Onion yellows phytoplasma</i> | AP006628          |
| <i>Ureaplasma urealyticum</i>    | AF222894          |

*(End of table)*
