# Supplementary material for: In silico prioritisation of candidate genes for prokaryotic gene function discovery: an application of phylogenetic profiles
Source: Springer Nature journal article supplement (doi:10.1186/1471-2105-10-86), 2009-03-17
Supplement: 12859_2008_2816_MOESM5_ESM.pdf [file 12859_2008_2816_MOESM5_ESM.pdf]

Table A-5: Genes and the ranks of control validation set (glycolysis) used in Case study 1

| Gene             | Gene product                             | SA-2603 |            | EC-K12 |            |
|------------------|------------------------------------------|---------|------------|--------|------------|
|                  |                                          | Locus   | <i>pct</i> | Locus  | <i>pct</i> |
| <i>glk</i>       | glucokinase                              | SAG0471 | 19.5       | b2388  | 36.4       |
| <i>pgi</i>       | glucose-6-phosphate isomerase            | SAG0402 | 95.8       | b4025  | 5.9        |
| <i>pfkA</i>      | 6-phosphofructokinase                    | SAG0940 | 97.6       | b1723  | 49.7       |
|                  |                                          |         |            | b3916  | 99.6       |
| <i>fba, dhnA</i> | fructose-bisphosphate aldolase           | SAG0127 | 97.7       | b2097  | 96.1       |
|                  |                                          |         |            | b2925  | 99.7       |
| <i>gap</i>       | glyceraldehyde-3-phosphate dehydrogenase | SAG1768 | 94.0       | b1779  | 3.0        |
| <i>pgk</i>       | phosphoglycerate kinase                  | SAG1766 | 94.5       | b2926  | 2.4        |
| <i>gpm</i>       | phosphoglycerate mutase family protein   | SAG0092 | 31.6       | b0755  | 7.2        |
|                  |                                          | SAG0752 | 16.9       | b3612  | 100.0      |
|                  |                                          | SAG0764 | 5.0        | b4395  | 17.0       |
| <i>eno</i>       | phosphopyruvate hydratase                | SAG0628 | 32.1       | b2779  | 11.3       |
| <i>pyk</i>       | pyruvate kinase                          | SAG0941 | 55.7       | b1676  | 83.9       |
|                  |                                          |         |            | b1854  | 6.8        |
| <i>yccX</i>      | acylphosphatase                          | SAG1607 | 38.4       | b0968  | 9.5        |

Table 1: Case study 1: the position (in *pct*) of glycolysis genes using *amss* scoring functions on peptidoglycan genome examples
