# Supplementary material for: In silico prioritisation of candidate genes for prokaryotic gene function discovery: an application of phylogenetic profiles
Source: Springer Nature journal article supplement (doi:10.1186/1471-2105-10-86), 2009-03-17
Supplement: 12859_2008_2816_MOESM6_ESM.pdf [file 12859_2008_2816_MOESM6_ESM.pdf]

**Table A-6: Positive and negative genome examples used in the statistical CGP of anaerobic mixed-acid fermentation genes (case study 2)**

This table lists the 200 positive genome examples and 142 negative genome examples in the statistical CGP of anaerobic mixed-acid fermentation genes.

| Genome                                           | Genbank Accession                               |
|--------------------------------------------------|-------------------------------------------------|
| Positive genome examples (200)                   |                                                 |
| <i>Anaeromyxobacter dehalogenans</i> 2CP-C       | CP000251                                        |
| <i>Bacteroides fragilis</i> NCTC 9434            | CR626927,<br>CR626928                           |
| <i>Bacteroides fragilis</i> YCH46                | AP006841,<br>AP006842                           |
| <i>Bacteroides thetaiotaomicron</i> VPI-5482     | AE015928,<br>AY171301                           |
| <i>Bifidobacterium adolescentis</i> ATCC 15703   | AP009256                                        |
| <i>Bifidobacterium longum</i>                    | AE014295,<br>AF540971                           |
| <i>Carboxydotherrmus hydrogenoformans</i> Z-2901 | CP000141                                        |
| <i>Chlorobium tepidum</i> TLS                    | AE006470                                        |
| <i>Clostridium acetobutylicum</i>                | AE001437,<br>AE001438                           |
| <i>Clostridium novyi</i> NT                      | CP000382                                        |
| <i>Clostridium perfringens</i>                   | AP003515,<br>BA000016                           |
| <i>Clostridium perfringens</i> ATCC 13124        | CP000246                                        |
| <i>Clostridium perfringens</i> SM101             | CP000312,<br>CP000313,<br>CP000314,<br>CP000315 |
| <i>Clostridium tetani</i> E88                    | AE015927,<br>AF528097                           |
| <i>Clostridium thermocellum</i> ATCC 27405       |                                                 |
| <i>Dehalococcoides</i> CBDB1                     | AJ965256                                        |
| <i>Dehalococcoides ethenogenes</i> 195           | CP000027                                        |
| <i>Desulfitobacterium hafniense</i> Y51          | AP008230                                        |
| <i>Desulfotalea psychrophila</i> Lsv54           | CR522870,<br>CR522871,<br>CR522872              |
| <i>Desulfovibrio desulfuricans</i> G20           | CP000112                                        |
| <i>Desulfovibrio vulgaris</i> DP4                | CP000527,<br>CP000528                           |
| <i>Desulfovibrio vulgaris</i> Hildenborough      | AE017285,<br>AE017286                           |
| <i>Fusobacterium nucleatum</i>                   | AE009951                                        |
| <i>Geobacter metallireducens</i> GS-15           | CP000148,<br>CP000149                           |

(Continue on next page)

| Genome                                         | Genbank Accession                  |
|------------------------------------------------|------------------------------------|
| <i>Geobacter sulfurreducens</i>                | AE017180                           |
| <i>Haemophilus ducreyi</i> 35000HP             | AE017143                           |
| <i>Mannheimia succiniciproducens</i> MBEL55E   | AE016827                           |
| <i>Moorella thermoacetica</i> ATCC 39073       | CP000232                           |
| <i>Pelobacter carbinolicus</i>                 | CP000142                           |
| <i>Pelobacter propionicus</i> DSM 2379         | CP000482,<br>CP000483,<br>CP000484 |
| <i>Pelodictyon luteolum</i> DSM 273            | CP000096                           |
| <i>Porphyromonas gingivalis</i> W83            | AE015924                           |
| <i>Propionibacterium acnes</i> KPA171202       | AE017283                           |
| <i>Psychromonas ingrahamii</i> 37              | CP000510                           |
| <i>Streptococcus thermophilus</i> CNRZ1066     | CP000024                           |
| <i>Streptococcus thermophilus</i> LMG 18311    | CP000023                           |
| <i>Syntrophobacter fumaroxidans</i> MPOB       | CP000478                           |
| <i>Syntrophomonas wolfei</i> Goettingen        | CP000448                           |
| <i>Syntrophus aciditrophicus</i> SB            | CP000252                           |
| <i>Thermoanaerobacter tengcongensis</i>        | AE008691                           |
| <i>Thermotoga maritima</i>                     | AE000512                           |
| <i>Thiomicrospira crunogena</i> XCL-2          | CP000109                           |
| <i>Thiomicrospira denitrificans</i> ATCC 33889 | CP000153                           |
| <i>Treponema denticola</i> ATCC 35405          | AE017226                           |
| <i>Treponema pallidum</i>                      | AE000520                           |
| <i>Zymomonas mobilis</i> ZM4                   | AE008692                           |
| <i>Aeromonas hydrophila</i> ATCC 7966          | CP000462                           |
| <i>Alkalilimnicola ehrlichei</i> MLHE-1        | CP000453                           |
| <i>Azoarcus</i> sp EbN1                        | CR555306,<br>CR555307,<br>CR555308 |
| <i>Bacillus anthracis</i> Ames                 | AE016879                           |
| <i>Bacillus anthracis</i> Ames 0581            | AE017334,<br>AE017335,<br>AE017336 |
| <i>Bacillus anthracis</i> str Sterne           | AE017225                           |
| <i>Bacillus halodurans</i>                     | BA000004                           |
| <i>Bacillus licheniformis</i> DSM 13           | AE017333                           |
| <i>Bacillus subtilis</i>                       | AL009126                           |
| <i>Bacillus thuringiensis</i> Al Hakam         | CP000485,<br>CP000486              |
| <i>Bacillus thuringiensis</i> konkukian        | AE017355,<br>CP000047              |
| <i>Brucella abortus</i> 9-941                  | AE017223,<br>AE017224              |
| <i>Brucella melitensis</i> biovar Abortus      | AM040264,<br>AM040265              |

(Continue on next page)

| Genome                                                   | Genbank Accession                               |
|----------------------------------------------------------|-------------------------------------------------|
| <i>Burkholderia</i> 383                                  | CP000150,<br>CP000151,<br>CP000152              |
| <i>Chlorobium phaeobacteroides</i> DSM 266               | CP000492                                        |
| <i>Chromobacterium violaceum</i>                         | AE016825                                        |
| <i>Colwellia psychrerythraea</i> 34H                     | CP000083                                        |
| <i>Corynebacterium efficiens</i> YS-314                  | BA000035                                        |
| <i>Corynebacterium glutamicum</i> ATCC 13032 Bielefeld   | BX927147                                        |
| <i>Corynebacterium jeikeium</i> K411                     | AF401314,<br>CR931997                           |
| <i>Coxiella burnetii</i>                                 | AE016828,<br>AE016829                           |
| <i>Cyanobacteria bacterium</i> Yellowstone A-Prime       | CP000239                                        |
| <i>Cyanobacteria bacterium</i> Yellowstone B-Prime       | CP000240                                        |
| <i>Dechloromonas aromatica</i> RCB                       | CP000089                                        |
| <i>Enterococcus faecalis</i> V583                        | AE016830,<br>AE016831,<br>AE016832,<br>AE016833 |
| <i>Erwinia carotovora atroseptica</i> SCRI1043           | BX950851                                        |
| <i>Escherichia coli</i> 536                              | CP000247                                        |
| <i>Escherichia coli</i> APEC O1                          | CP000468                                        |
| <i>Escherichia coli</i> CFT073                           | AE014075                                        |
| <i>Escherichia coli</i> K12                              | U00096                                          |
| <i>Escherichia coli</i> O157H7                           | AB011548,<br>AB011549,<br>BA000007              |
| <i>Escherichia coli</i> O157H7 EDL933                    | AE005174,<br>AF074613                           |
| <i>Escherichia coli</i> UTI89                            | CP000243,<br>CP000244                           |
| <i>Escherichia coli</i> W3110                            |                                                 |
| <i>Haemophilus influenzae</i>                            |                                                 |
| <i>Haemophilus influenzae</i> 86 028NP                   | CP000057                                        |
| <i>Haemophilus somnus</i> 129PT                          | CP000019,<br>CP000436                           |
| <i>Hahella chejuensis</i> KCTC 2396                      | CP000155                                        |
| <i>Lactobacillus acidophilus</i> NCFM                    | CP000033                                        |
| <i>Lactobacillus brevis</i> ATCC 367                     | CP000416,<br>CP000417,<br>CP000418              |
| <i>Lactobacillus casei</i> ATCC 334                      | CP000423,<br>CP000424                           |
| <i>Lactobacillus delbrueckii bulgaricus</i>              | CR954253                                        |
| <i>Lactobacillus delbrueckii bulgaricus</i> ATCC BAA-365 | CP000412                                        |
| <i>Lactobacillus gasseri</i> ATCC 33323                  | CP000413                                        |
| <i>Lactobacillus johnsonii</i> NCC 533                   | AE017198                                        |

(Continue on next page)

| Genome                                         | Genbank Accession                                                         |
|------------------------------------------------|---------------------------------------------------------------------------|
| <i>Lactobacillus plantarum</i>                 | AL935263,<br>CR377164,<br>CR377165,<br>CR377166                           |
| <i>Lactobacillus sakei</i> 23K                 | CR936503                                                                  |
| <i>Lactobacillus salivarius</i> UCC118         | AF488831,<br>AF488832,<br>CP000233,<br>CP000234                           |
| <i>Lactococcus lactis</i>                      | AE005176                                                                  |
| <i>Lactococcus lactis cremoris</i> MG1363      | AM406671                                                                  |
| <i>Lactococcus lactis cremoris</i> SK11        | CP000425,<br>CP000426,<br>CP000427,<br>CP000428,<br>CP000429,<br>CP000430 |
| <i>Lawsonia intracellularis</i> PHE MN1-00     | AM180252,<br>AM180253,<br>AM180254,<br>AM180255                           |
| <i>Leuconostoc mesenteroides</i> ATCC 8293     | CP000414,<br>CP000415                                                     |
| <i>Listeria innocua</i>                        | AL592022,<br>AL592102                                                     |
| <i>Listeria monocytogenes</i>                  | AL591824                                                                  |
| <i>Listeria monocytogenes</i> 4b F2365         | AE017262                                                                  |
| <i>Listeria welshimeri</i> serovar 6b SLCC5334 | AM263198                                                                  |
| <i>Magnetococcus</i> MC-1                      | CP000471                                                                  |
| <i>Maricaulis maris</i> MCS10                  | CP000449                                                                  |
| <i>Marinobacter aquaeolei</i> VT8              |                                                                           |
| <i>Mesoplasma florum</i> L1                    | AE017263                                                                  |
| <i>Methylibium petroleiphilum</i> PM1          | CP000555,<br>CP000556                                                     |
| <i>Mycoplasma capricolum</i> ATCC 27343        | CP000123                                                                  |
| <i>Mycoplasma gallisepticum</i>                | AE015450                                                                  |
| <i>Mycoplasma hyopneumoniae</i> 232            | AE017332                                                                  |
| <i>Mycoplasma hyopneumoniae</i> 7448           | AE017244                                                                  |
| <i>Mycoplasma hyopneumoniae</i> J              | AE017243                                                                  |
| <i>Mycoplasma mobile</i> 163K                  | AE017308                                                                  |
| <i>Mycoplasma mycoides</i>                     | BX293980                                                                  |
| <i>Mycoplasma penetrans</i>                    | BA000026                                                                  |
| <i>Mycoplasma pneumoniae</i>                   | U00089                                                                    |
| <i>Mycoplasma pulmonis</i>                     | AL445566                                                                  |
| <i>Mycoplasma synoviae</i> 53                  | AE017245                                                                  |
| <i>Nitrobacter winogradskyi</i> Nb-255         | CP000115                                                                  |
| <i>Oenococcus oeni</i> PSU-1                   | CP000411                                                                  |

(Continue on next page)

| Genome                                         | Genbank Accession                                                                      |
|------------------------------------------------|----------------------------------------------------------------------------------------|
| <i>Pasteurella multocida</i>                   | AE004439                                                                               |
| <i>Pediococcus pentosaceus</i> ATCC 25745      | CP000422                                                                               |
| <i>Photobacterium profundum</i> SS9            | CR354531,<br>CR354532,<br>CR377818                                                     |
| <i>Photorhabdus luminescens</i>                | BX470251                                                                               |
| <i>Ralstonia eutropha</i> H16                  | AM260479,<br>AM260480                                                                  |
| <i>Ralstonia eutropha</i> JMP134               | CP000090,<br>CP000091,<br>CP000092,<br>CP000093                                        |
| <i>Ralstonia metallidurans</i> CH34            | CP000352,<br>CP000353,<br>CP000354,<br>CP000355                                        |
| <i>Rhodobacter sphaeroides</i> 2 4 1           | CP000143,<br>CP000144,<br>CP000145,<br>CP000146,<br>CP000147,<br>DQ232586,<br>DQ232587 |
| <i>Rhodoferrax ferrireducens</i> T118          | CP000267,<br>CP000268                                                                  |
| <i>Rhodopseudomonas palustris</i> BisA53       | CP000463                                                                               |
| <i>Rhodopseudomonas palustris</i> BisB18       | CP000301                                                                               |
| <i>Rhodopseudomonas palustris</i> BisB5        | CP000283                                                                               |
| <i>Rhodopseudomonas palustris</i> CGA009       | BX571963,<br>BX571964                                                                  |
| <i>Rhodopseudomonas palustris</i> HaA2         | CP000250                                                                               |
| <i>Rhodospirillum rubrum</i> ATCC 11170        | CP000230,<br>CP000231                                                                  |
| <i>Salmonella enterica</i> Choleraesuis        | AE017220,<br>AY509003,<br>AY509004                                                     |
| <i>Salmonella enterica</i> Paratyphi ATCC 9150 | CP000026                                                                               |
| <i>Salmonella typhi</i>                        | AL513382,<br>AL513383,<br>AL513384                                                     |
| <i>Salmonella typhi</i> Ty2                    | AE014613                                                                               |
| <i>Salmonella typhimurium</i> LT2              | AE006468,<br>AE006471                                                                  |
| <i>Shewanella</i> ANA-3                        | CP000469,<br>CP000470                                                                  |
| <i>Shewanella</i> MR-4                         | CP000446                                                                               |

(Continue on next page)

| Genome                                       | Genbank Accession                                                                      |
|----------------------------------------------|----------------------------------------------------------------------------------------|
| <i>Shewanella</i> MR-7                       | CP000444,<br>CP000445                                                                  |
| <i>Shewanella</i> W3-18-1                    | CP000503                                                                               |
| <i>Shewanella amazonensis</i> SB2B           | CP000507                                                                               |
| <i>Shewanella denitrificans</i> OS217        | CP000302                                                                               |
| <i>Shewanella frigidimarina</i> NCIMB 400    | CP000447                                                                               |
| <i>Shewanella oneidensis</i>                 | AE014299,<br>AE014300                                                                  |
| <i>Shigella boydii</i> Sb227                 | CP000036,<br>CP000037                                                                  |
| <i>Shigella dysenteriae</i>                  | CP000034,<br>CP000035                                                                  |
| <i>Shigella flexneri</i> 2a                  | AE005674,<br>AF386526                                                                  |
| <i>Shigella flexneri</i> 2a 2457T            | AE014073                                                                               |
| <i>Shigella flexneri</i> 5 8401              | CP000266                                                                               |
| <i>Shigella sonnei</i> Ss046                 | CP000038,<br>CP000039                                                                  |
| <i>Staphylococcus aureus</i> COL             | CP000045,<br>CP000046                                                                  |
| <i>Staphylococcus aureus</i> MW2             | BA000033                                                                               |
| <i>Staphylococcus aureus</i> Mu50            | AP003367,<br>BA000017                                                                  |
| <i>Staphylococcus aureus</i> N315            | AP003139,<br>BA000018                                                                  |
| <i>Staphylococcus aureus</i> NCTC 8325       | CP000253                                                                               |
| <i>Staphylococcus aureus</i> RF122           | AJ938182                                                                               |
| <i>Staphylococcus aureus</i> USA300          | CP000255,<br>CP000256,<br>CP000257,<br>CP000258                                        |
| <i>Staphylococcus aureus aureus</i> MRSA252  | BX571856                                                                               |
| <i>Staphylococcus aureus aureus</i> MSSA476  | BX571857,<br>BX571858                                                                  |
| <i>Staphylococcus epidermidis</i> ATCC 12228 | AE015929,<br>AE015930,<br>AE015931,<br>AE015932,<br>AE015933,<br>AE015934,<br>AE015935 |
| <i>Staphylococcus epidermidis</i> RP62A      | CP000028,<br>CP000029                                                                  |
| <i>Staphylococcus haemolyticus</i>           | AP006716                                                                               |
| <i>Staphylococcus saprophyticus</i>          | AP008934,<br>AP008935,<br>AP008936                                                     |

(Continue on next page)

| Genome                                       | Genbank Accession                               |
|----------------------------------------------|-------------------------------------------------|
| <i>Streptococcus agalactiae</i> 2603         | AE009948                                        |
| <i>Streptococcus agalactiae</i> A909         | CP000114                                        |
| <i>Streptococcus agalactiae</i> NEM316       | AL732656                                        |
| <i>Streptococcus mutans</i>                  | AE014133                                        |
| <i>Streptococcus pneumoniae</i> D39          | CP000410                                        |
| <i>Streptococcus pneumoniae</i> R6           | AE007317                                        |
| <i>Streptococcus pyogenes</i> M1 GAS         | AE004092                                        |
| <i>Streptococcus pyogenes</i> MGAS10270      | CP000260                                        |
| <i>Streptococcus pyogenes</i> MGAS10394      | CP000003                                        |
| <i>Streptococcus pyogenes</i> MGAS10750      | CP000262                                        |
| <i>Streptococcus pyogenes</i> MGAS2096       | CP000261                                        |
| <i>Streptococcus pyogenes</i> MGAS315        | AE014074                                        |
| <i>Streptococcus pyogenes</i> MGAS5005       | CP000017                                        |
| <i>Streptococcus pyogenes</i> MGAS6180       | CP000056                                        |
| <i>Streptococcus pyogenes</i> MGAS8232       | AE009949                                        |
| <i>Streptococcus pyogenes</i> MGAS9429       | CP000259                                        |
| <i>Streptococcus pyogenes</i> SSI-1          | BA000034                                        |
| <i>Streptococcus sanguinis</i> SK36          |                                                 |
| <i>Streptococcus thermophilus</i> LMD-9      | CP000419,<br>CP000420,<br>CP000421              |
| <i>Thiobacillus denitrificans</i> ATCC 25259 | CP000116                                        |
| <i>Ureaplasma urealyticum</i>                | AF222894                                        |
| <i>Vibrio cholerae</i>                       | AE003852,<br>AE003853                           |
| <i>Vibrio parahaemolyticus</i>               | BA000031,<br>BA000032                           |
| <i>Vibrio vulnificus</i> CMCP6               | AE016795,<br>AE016796                           |
| <i>Vibrio vulnificus</i> YJ016               | AP005352,<br>BA000037,<br>BA000038              |
| <i>Yersinia enterocolitica</i> 8081          |                                                 |
| <i>Yersinia pestis</i> Antiqua               | CP000308,<br>CP000309,<br>CP000310,<br>CP000311 |
| <i>Yersinia pestis</i> CO92                  | AL109969,<br>AL117189,<br>AL117211,<br>AL590842 |
| <i>Yersinia pestis</i> KIM                   | AE009952,<br>AF074611                           |
| <i>Yersinia pestis</i> Nepal516              | CP000305,<br>CP000306,<br>CP000307              |

(Continue on next page)

| Genome                                              | Genbank Accession                                                         |
|-----------------------------------------------------|---------------------------------------------------------------------------|
| <i>Yersinia pestis</i> biovar Mediaevails           | AE017042,<br>AE017043,<br>AE017044,<br>AE017045,<br>AE017046              |
| <i>Yersinia pseudotuberculosis</i> IP32953          | BX936398,<br>BX936399,<br>BX936400                                        |
| Negative genome examples (142)                      |                                                                           |
| <i>Acidothermus cellulolyticus</i> 11B              | CP000481                                                                  |
| <i>Acidovorax</i> JS42                              | CP000539,<br>CP000540,<br>CP000541                                        |
| <i>Acidovorax avenae citrulli</i> AAC00-1           | CP000512                                                                  |
| <i>Acinetobacter</i> sp ADP1                        | CR543861                                                                  |
| <i>Agrobacterium tumefaciens</i> C58 UWash          | AE008687,<br>AE008688,<br>AE008689,<br>AE008690                           |
| <i>Alcanivorax borkumensis</i> SK2                  | AM286690                                                                  |
| <i>Anabaena variabilis</i> ATCC 29413               | CP000117,<br>CP000119,<br>CP000120,<br>CP000121                           |
| <i>Anaplasma marginale</i> St Maries                | CP000030                                                                  |
| <i>Anaplasma phagocytophilum</i> HZ                 | CP000235                                                                  |
| <i>Aquifex aeolicus</i>                             | AE000657,<br>AE000667                                                     |
| <i>Arthrobacter aurescens</i> TC1                   | CP000474,<br>CP000475,<br>CP000476                                        |
| <i>Aster yellows witches-broom phytoplasma</i> AYWB | CP000061,<br>CP000062,<br>CP000063,<br>CP000064,<br>CP000065              |
| <i>Bacillus cereus</i> ATCC14579                    | AE016877,<br>AE016878                                                     |
| <i>Bacillus cereus</i> ATCC 10987                   | AE017194,<br>AE017195                                                     |
| <i>Bacillus cereus</i> ZK                           | CP000001,<br>CP000040,<br>CP000041,<br>CP000042,<br>CP000043,<br>CP000044 |
| <i>Bartonella bacilliformis</i> KC583               | CP000524                                                                  |

(Continue on next page)



| Genome                                  | Genbank Accession                                                                                                                                                                                                                                                                         |
|-----------------------------------------|-------------------------------------------------------------------------------------------------------------------------------------------------------------------------------------------------------------------------------------------------------------------------------------------|
| <i>Bartonella henselae</i> Houston-1    | BX897699                                                                                                                                                                                                                                                                                  |
| <i>Bartonella quintana</i> Toulouse     | BX897700                                                                                                                                                                                                                                                                                  |
| <i>Bdellovibrio bacteriovorus</i>       | BX842601                                                                                                                                                                                                                                                                                  |
| <i>Bordetella bronchiseptica</i>        | BX470250                                                                                                                                                                                                                                                                                  |
| <i>Bordetella parapertussis</i>         | BX470249                                                                                                                                                                                                                                                                                  |
| <i>Bordetella pertussis</i>             | BX470248                                                                                                                                                                                                                                                                                  |
| <i>Borrelia afzelii</i> PKo             | CP000395,<br>CP000396,<br>CP000397,<br>CP000398,<br>CP000399,<br>CP000400,<br>CP000401,<br>CP000402,<br>CP000403                                                                                                                                                                          |
| <i>Borrelia burgdorferi</i>             | AE000784,<br>AE000785,<br>AE000786,<br>AE000787,<br>AE000788,<br>AE000789,<br>AE000790,<br>AE000791,<br>AE000792,<br>AE000793,<br>AE000794,<br>AE001115,<br>AE001575,<br>AE001576,<br>AE001577,<br>AE001578,<br>AE001579,<br>AE001580,<br>AE001581,<br>AE001582,<br>AE001583,<br>AE001584 |
| <i>Bradyrhizobium japonicum</i>         | BA000040                                                                                                                                                                                                                                                                                  |
| <i>Brucella melitensis</i>              | AE008917,<br>AE008918                                                                                                                                                                                                                                                                     |
| <i>Brucella suis</i> 1330               | AE014291,<br>AE014292                                                                                                                                                                                                                                                                     |
| <i>Burkholderia pseudomallei</i> 1710b  | CP000124,<br>CP000125                                                                                                                                                                                                                                                                     |
| <i>Burkholderia pseudomallei</i> K96243 | BX571965,<br>BX571966                                                                                                                                                                                                                                                                     |

(Continue on next page)

| Genome                                                      | Genbank Accession                                                         |
|-------------------------------------------------------------|---------------------------------------------------------------------------|
| <i>Burkholderia thailandensis</i> E264                      | CP000085,<br>CP000086                                                     |
| <i>Candidatus</i> Pelagibacter ubique HTCC1062              | CP000084                                                                  |
| <i>Caulobacter crescentus</i>                               | AE005673                                                                  |
| <i>Chromohalobacter salexigens</i> DSM 3043                 | CP000285                                                                  |
| <i>Corynebacterium diphtheriae</i>                          | BX248353                                                                  |
| <i>Cytophaga hutchinsonii</i> ATCC 33406                    | CP000383                                                                  |
| <i>Deinococcus geothermalis</i> DSM 11300                   | CP000358,<br>CP000359                                                     |
| <i>Deinococcus radiodurans</i>                              | AE000513,<br>AE001825,<br>AE001826,<br>AE001827                           |
| <i>Erythrobacter litoralis</i> HTCC2594                     | CP000157                                                                  |
| <i>Francisella tularensis</i> FSC 198                       | AM286280                                                                  |
| <i>Francisella tularensis holarctica</i>                    | AM233362                                                                  |
| <i>Francisella tularensis holarctica</i> OSU18              | CP000437                                                                  |
| <i>Francisella tularensis novicida</i> U112                 | CP000439                                                                  |
| <i>Francisella tularensis tularensis</i>                    | AJ749949                                                                  |
| <i>Frankia</i> CcI3                                         | CP000249                                                                  |
| <i>Geobacillus kaustophilus</i> HTA426                      | AP006520,<br>BA000043                                                     |
| <i>Gluconobacter oxydans</i> 621H                           | CP000004,<br>CP000005,<br>CP000006,<br>CP000007,<br>CP000008,<br>CP000009 |
| <i>Gramella forsetii</i> KT0803                             | CU207366                                                                  |
| <i>Helicobacter hepaticus</i>                               | AE017125                                                                  |
| <i>Helicobacter pylori</i> 26695                            | AE000511                                                                  |
| <i>Helicobacter pylori</i> HPAG1                            | CP000241,<br>CP000242                                                     |
| <i>Helicobacter pylori</i> J99                              | AE001439                                                                  |
| <i>Hyphomonas neptunium</i> ATCC 15444                      | CP000158                                                                  |
| <i>Idiomarina loihiensis</i> L2TR                           | AE017340                                                                  |
| <i>Jannaschia</i> CCS1                                      | CP000264,<br>CP000265                                                     |
| <i>Legionella pneumophila</i> Lens                          | CR628337,<br>CR628339                                                     |
| <i>Legionella pneumophila</i> Paris                         | CR628336,<br>CR628338                                                     |
| <i>Legionella pneumophila</i> Philadelphia 1                | AE017354                                                                  |
| <i>Leifsonia xyli xyli</i> CTCB0                            | AE016822                                                                  |
| <i>Leptospira borgpetersenii</i> serovar Hardjo-bovis JB197 | CP000350,<br>CP000351                                                     |

(Continue on next page)

| Genome                                                     | Genbank Accession                               |
|------------------------------------------------------------|-------------------------------------------------|
| <i>Leptospira borgpetersenii</i> serovar Hardjo-bovis L550 | CP000348,<br>CP000349                           |
| <i>Leptospira interrogans</i> serovar Copenhageni          | AE016823,<br>AE016824                           |
| <i>Leptospira interrogans</i> serovar Lai                  | AE010300,<br>AE010301                           |
| <i>Mesorhizobium</i> BNC1                                  | CP000389,<br>CP000390,<br>CP000391,<br>CP000392 |
| <i>Mesorhizobium loti</i>                                  | AP003017,<br>BA000012,<br>BA000013              |
| <i>Methylobacillus flagellatus</i> KT                      | CP000284                                        |
| <i>Methylococcus capsulatus</i> Bath                       | AE017282                                        |
| <i>Mycobacterium avium</i> 104                             | CP000479                                        |
| <i>Mycobacterium avium</i> paratuberculosis                | AE016958                                        |
| <i>Mycobacterium bovis</i>                                 | BX248333                                        |
| <i>Mycobacterium bovis</i> BCG Pasteur 1173P2              | AM408590                                        |
| <i>Mycobacterium leprae</i>                                | AL450380                                        |
| <i>Mycobacterium smegmatis</i> MC2 155                     | CP000480                                        |
| <i>Mycobacterium tuberculosis</i> CDC1551                  | AE000516                                        |
| <i>Mycobacterium tuberculosis</i> H37Rv                    | AL123456                                        |
| <i>Mycobacterium ulcerans</i> Agy99                        | CP000325                                        |
| <i>Mycobacterium vanbaalenii</i> PYR-1                     | CP000511                                        |
| <i>Myxococcus xanthus</i> DK 1622                          | CP000113                                        |
| <i>Neisseria gonorrhoeae</i> FA 1090                       | AE004969                                        |
| <i>Neisseria meningitidis</i> FAM18                        | AM421808                                        |
| <i>Neisseria meningitidis</i> MC58                         | AE002098                                        |
| <i>Neisseria meningitidis</i> Z2491                        | AL157959                                        |
| <i>Nitrobacter hamburgensis</i> X14                        | CP000319,<br>CP000320,<br>CP000321,<br>CP000322 |
| <i>Nitrosomonas europaea</i>                               | AL954747                                        |
| <i>Nitrosospira multififormis</i> ATCC 25196               | CP000103,<br>CP000104,<br>CP000105,<br>CP000106 |
| <i>Nocardia farcinica</i> IFM10152                         | AP006618,<br>AP006619,<br>AP006620              |
| <i>Nocardioides</i> JS614                                  | CP000508,<br>CP000509                           |

(Continue on next page)

| Genome                                           | Genbank Accession                                                                                                |
|--------------------------------------------------|------------------------------------------------------------------------------------------------------------------|
| <i>Nostoc sp</i>                                 | AP003602,<br>AP003603,<br>AP003604,<br>AP003605,<br>AP003606,<br>BA000019,<br>BA000020                           |
| <i>Novosphingobium aromaticivorans</i> DSM 12444 | CP000248                                                                                                         |
| <i>Oceanobacillus iheyensis</i>                  | BA000028                                                                                                         |
| <i>Onion yellows phytoplasma</i>                 | AP006628                                                                                                         |
| <i>Paracoccus denitrificans</i> PD1222           | CP000489,<br>CP000490,<br>CP000491                                                                               |
| <i>Pirellula sp</i>                              | BX119912                                                                                                         |
| <i>Polaromonas JS666</i>                         | CP000316,<br>CP000317,<br>CP000318                                                                               |
| <i>Polaromonas naphthalenivorans</i> CJ2         | CP000529,<br>CP000530,<br>CP000531,<br>CP000532,<br>CP000533,<br>CP000534,<br>CP000535,<br>CP000536,<br>CP000537 |
| <i>Pseudoalteromonas atlantica</i> T6c           | CP000388                                                                                                         |
| <i>Pseudoalteromonas haloplanktis</i> TAC125     | CR954246,<br>CR954247                                                                                            |
| <i>Pseudomonas aeruginosa</i>                    | AE004091                                                                                                         |
| <i>Pseudomonas aeruginosa</i> UCBPP-PA14         | CP000438                                                                                                         |
| <i>Pseudomonas fluorescens</i> Pf-5              | CP000076                                                                                                         |
| <i>Pseudomonas fluorescens</i> PfO-1             | CP000094                                                                                                         |
| <i>Pseudomonas putida</i> KT2440                 | AE015451                                                                                                         |
| <i>Pseudomonas syringae phaseolicola</i> 1448A   | CP000058,<br>CP000059,<br>CP000060                                                                               |
| <i>Pseudomonas syringae</i> pv B728a             | CP000075                                                                                                         |
| <i>Pseudomonas syringae</i> tomato DC3000        | AE016853,<br>AE016854,<br>AE016855                                                                               |
| <i>Ralstonia solanacearum</i>                    | AL646052,<br>AL646053                                                                                            |

(Continue on next page)

| Genome                                               | Genbank Accession                                                                      |
|------------------------------------------------------|----------------------------------------------------------------------------------------|
| <i>Rhizobium leguminosarum</i> bv <i>viciae</i> 3841 | AM236080,<br>AM236081,<br>AM236082,<br>AM236083,<br>AM236084,<br>AM236085,<br>AM236086 |
| <i>Rhodococcus</i> RHA1                              | CP000431,<br>CP000432,<br>CP000433,<br>CP000434                                        |
| <i>Rickettsia conorii</i>                            | AE006914                                                                               |
| <i>Rickettsia prowazekii</i>                         | AJ235269                                                                               |
| <i>Rickettsia typhi wilmington</i>                   | AE017197                                                                               |
| <i>Rubrobacter xylanophilus</i> DSM 9941             | CP000386                                                                               |
| <i>Saccharophagus degradans</i> 2-40                 | CP000282                                                                               |
| <i>Salinibacter ruber</i> DSM 13855                  | CP000159,<br>CP000160                                                                  |
| <i>Silicibacter pomeroyi</i> DSS-3                   | CP000031,<br>CP000032                                                                  |
| <i>Sinorhizobium meliloti</i>                        | AE006469,<br>AL591688,<br>AL591985                                                     |
| <i>Solibacter usitatus</i> Ellin6076                 | CP000473                                                                               |
| <i>Sphingopyxis alaskensis</i> RB2256                | CP000356,<br>CP000357                                                                  |
| <i>Streptomyces avermitilis</i>                      | AP005645,<br>BA000030                                                                  |
| <i>Streptomyces coelicolor</i>                       | AL589148,<br>AL645771,<br>AL645882                                                     |
| <i>Thermobifida fusca</i> YX                         | CP000088                                                                               |
| <i>Thermus thermophilus</i> HB27                     | AE017221,<br>AE017222                                                                  |
| <i>Thermus thermophilus</i> HB8                      | AP008226,<br>AP008227,<br>AP008228                                                     |
| <i>Trichodesmium erythraeum</i> IMS101               | CP000393                                                                               |
| <i>Tropheryma whipplei</i> TW08 27                   | BX072543                                                                               |
| <i>Tropheryma whipplei</i> Twist                     | AE014184                                                                               |
| <i>Xanthomonas campestris</i>                        | AE008922                                                                               |
| <i>Xanthomonas campestris</i> 8004                   | CP000050                                                                               |
| <i>Xanthomonas campestris vesicatoria</i> 85-10      | AM039948,<br>AM039949,<br>AM039950,<br>AM039951,<br>AM039952                           |

(Continue on next page)

| Genome                                       | Genbank Accession                               |
|----------------------------------------------|-------------------------------------------------|
| <i>Xanthomonas citri</i>                     | AE008923,<br>AE008924,<br>AE008925              |
| <i>Xanthomonas oryzae</i> KACC10331          |                                                 |
| <i>Xanthomonas oryzae</i> MAFF 311018        | AP008229                                        |
| <i>Xylella fastidiosa</i>                    | AE003849,<br>AE003850,<br>AE003851              |
| <i>Xylella fastidiosa</i> Temecula1          | AE009442,<br>AE009443                           |
| <i>Azoarcus</i> BH72                         | AM406670                                        |
| <i>Campylobacter fetus</i> 82-40             | CP000487                                        |
| <i>Campylobacter jejuni</i>                  | AL111168                                        |
| <i>Campylobacter jejuni</i> RM1221           | CP000025                                        |
| <i>Helicobacter acinonychis</i> Sheeba       | AM260522,<br>AM260523                           |
| <i>Magnetospirillum magneticum</i> AMB-1     | AP007255                                        |
| <i>Sodalis glossinidius morsitans</i>        | AP008232,<br>AP008233,<br>AP008234,<br>AP008235 |
| <i>Symbiobacterium thermophilum</i> IAM14863 | AP006840                                        |
| <i>Wolinella succinogenes</i>                | BX571656                                        |

(End of table)
