# Supplementary material for: In silico prioritisation of candidate genes for prokaryotic gene function discovery: an application of phylogenetic profiles
Source: Springer Nature journal article supplement (doi:10.1186/1471-2105-10-86), 2009-03-17
Supplement: 12859_2008_2816_MOESM7_ESM.pdf [file 12859_2008_2816_MOESM7_ESM.pdf]

**Table A-7: Prioritised rank (*amss* scoring function) on SA-2603 genes**

The rank position, rank fraction (in *pct*), cluster of orthologous groups (COG), and loci of the prioritised rank by *amss* scoring function in the SA-2603 genome.

| Rank | <i>pct</i> | Score | COG | Valid. Set | Gene          | Locus   | Function                                                                                    |
|------|------------|-------|-----|------------|---------------|---------|---------------------------------------------------------------------------------------------|
| 1    | 0.05       | 0.97  | M   | M          | <i>pbp2A</i>  | SAG2066 | penicillin-binding protein 2A                                                               |
| 2    | 0.09       | 0.97  | O   |            | <i>groES</i>  | SAG2075 | co-chaperonin GroES                                                                         |
| 3    | 0.14       | 0.96  |     |            | <i>aroC</i>   | SAG1377 | chorismate synthase                                                                         |
| 3    | 0.14       | 0.96  | M   | B,M        | <i>alr</i>    | SAG1684 | alanine racemase                                                                            |
| 5    | 0.24       | 0.96  | M   | B,M        | <i>ddl</i>    | SAG0767 | D-alanylalanine synthetase                                                                  |
| 6    | 0.28       | 0.96  | M   | M          | <i>pbp1A</i>  | SAG0298 | penicillin-binding protein 1A                                                               |
| 7    | 0.33       | 0.96  | M   | M          |               | SAG0159 | penicillin-binding protein 1B, putative                                                     |
| 7    | 0.33       | 0.96  | E   |            | <i>aroB</i>   | SAG1378 | 3-dehydroquinate synthase                                                                   |
| 9    | 0.42       | 0.96  | M   | C,B,M      | <i>murD</i>   | SAG0475 | UDP- <i>N</i> -acetylmuramoyl-L-alanyl-D-glutamate synthetase                               |
| 9    | 0.42       | 0.96  |     |            | <i>ftsW</i>   | SAG0761 | cell division protein, FtsW/RodA/SpoVE family                                               |
| 9    | 0.42       | 0.96  | M   | C,B,M      | <i>murF</i>   | SAG0768 | UDP- <i>N</i> -acetylmuramoylalanyl-D-glutamyl-2,6-diaminopimelate-D-alanyl-D-alanyl ligase |
| 9    | 0.42       | 0.96  | M   | C,B,M      | <i>murA-1</i> | SAG0843 | UDP- <i>N</i> -acetylglucosamine 1-carboxyvinyltransferase                                  |
| 9    | 0.42       | 0.96  | M   | C,B,M      | <i>murA-2</i> | SAG0866 | UDP- <i>N</i> -acetylglucosamine 1-carboxyvinyltransferase                                  |
| 14   | 0.66       | 0.96  | M   |            | <i>pbpX</i>   | SAG0287 | penicillin-binding protein 2X                                                               |
| 14   | 0.66       | 0.96  | M   | B,M        | <i>mraY</i>   | SAG0288 | phospho- <i>N</i> -acetylmuramoyl-pentapeptide-transferase                                  |
| 14   | 0.66       | 0.96  | M   | C,B,M      | <i>murC</i>   | SAG1615 | UDP- <i>N</i> -acetylmuramate-L-alanine ligase                                              |
| 17   | 0.8        | 0.95  | M   |            |               | SAG0140 | glycosyl transferase, group 4 family protein                                                |
| 18   | 0.85       | 0.95  | E   |            | <i>aroE</i>   | SAG1680 | shikimate 5-dehydrogenase                                                                   |
| 19   | 0.89       | 0.95  | TK  |            |               | SAG0322 | DNA-binding response regulator                                                              |
| 20   | 0.94       | 0.95  | E   |            | <i>cysK</i>   | SAG0334 | cysteine synthase A                                                                         |
| 21   | 0.99       | 0.95  | M   | B,M        | <i>murE</i>   | SAG1391 | UDP- <i>N</i> -acetylmuramoylalanyl-D-glutamate-2,6-diaminopimelate ligase                  |
| 22   | 1.04       | 0.95  | T   |            |               | SAG1507 | phoH family protein                                                                         |

(Continue on next page)

| Rank                          | <i>pct</i> | Score | COG | Valid. Set | Gene        | Locus   | Function                                                     |
|-------------------------------|------------|-------|-----|------------|-------------|---------|--------------------------------------------------------------|
| 23                            | 1.08       | 0.94  | M   | B,M        | <i>glmU</i> | SAG1538 | UDP- <i>N</i> -acetylglucosamine pyrophosphorylase           |
| 24                            | 1.13       | 0.94  | R   |            |             | SAG0480 | ylmE protein, putative                                       |
| 25                            | 1.18       | 0.94  | O   |            | <i>radA</i> | SAG0110 | DNA repair protein RadA                                      |
| 26                            | 1.22       | 0.94  | Q   |            | <i>dltA</i> | SAG1790 | D-alanine-D-alanyl carrier protein ligase                    |
| 27                            | 1.27       | 0.94  |     |            | <i>rodA</i> | SAG0621 | rod shape-determining protein RodA, putative                 |
| 28                            | 1.32       | 0.94  | EH  |            |             | SAG1528 | chorismate binding enzyme                                    |
| 29                            | 1.37       | 0.94  | O   |            | <i>clpX</i> | SAG1312 | ATP-dependent protease ATP-binding subunit                   |
| 29                            | 1.37       | 0.94  | OU  |            | <i>clpP</i> | SAG1585 | ATP-dependent Clp protease proteolytic subunit               |
| 31                            | 1.46       | 0.94  | J   |            | <i>rpsA</i> | SAG1150 | 30S ribosomal protein S1                                     |
| 32                            | 1.51       | 0.94  | H   |            |             | SAG0498 | geranyltranstransferase, putative                            |
| 32                            | 1.51       | 0.94  | H   |            |             | SAG1738 | polyprenyl synthetase family protein                         |
| 34                            | 1.6        | 0.94  | E   |            |             | SAG0339 | aspartate kinase                                             |
| 35                            | 1.65       | 0.94  | O   |            |             | SAG1530 | peptidyl-prolyl cis-trans isomerase, cyclophilin-type        |
| 36                            | 1.69       | 0.94  | I   |            | <i>accC</i> | SAG0352 | acetyl-CoA carboxylase                                       |
| 37                            | 1.74       | 0.93  | M   | B,M        | <i>murI</i> | SAG1600 | glutamate racemase                                           |
| 38                            | 1.79       | 0.93  | L   |            | <i>nth</i>  | SAG0468 | endonuclease III                                             |
|                               |            |       |     |            |             |         | ⋮                                                            |
| Remaining peptidoglycan genes |            |       |     |            |             |         |                                                              |
| 43                            | 2.02       | 0.93  | I   | B,M        | <i>uppS</i> | SAG1916 | undecaprenyl diphosphate synthase                            |
| 56                            | 2.64       | 0.92  | M   | B,M        | <i>glmS</i> | SAG0944 | D-fructose-6-phosphate amidotransferase                      |
| 62                            | 2.92       | 0.92  |     | B,M        | <i>uppP</i> | SAG0138 | undecaprenyl pyrophosphate phosphatase                       |
| 73                            | 3.44       | 0.92  | M   | C,B,M      | <i>murG</i> | SAG0476 | <i>N</i> -acetylglucosaminyl transferase                     |
| 90                            | 4.24       | 0.91  | M   | M          |             | SAG0765 | penicillin-binding protein 2b                                |
| 108                           | 5.08       | 0.90  |     | B,M        | <i>glnA</i> | SAG1763 | glutamine synthetase, type I                                 |
| 159                           | 7.49       | 0.86  | M   | C,B,M      | <i>murB</i> | SAG1112 | UDP- <i>N</i> -acetylenolpyruvoylglucosamine reductase       |
| 264                           | 12.43      | 0.81  | G   | B,M        |             | SAG0887 | phosphoglucomutase/phosphomannomutase family protein         |
| 276                           | 12.99      | 0.81  | M   | M          |             | SAG0146 | penicillin-binding protein 4, putative                       |
| 566                           | 26.65      | 0.66  | NU  | M          |             | SAG0094 | <i>N</i> -acetylmuramoyl-L-alanine amidase, family 4 protein |

(End of table)
