# Supplementary material for: In silico prioritisation of candidate genes for prokaryotic gene function discovery: an application of phylogenetic profiles
Source: Springer Nature journal article supplement (doi:10.1186/1471-2105-10-86), 2009-03-17
Supplement: 12859_2008_2816_MOESM9_ESM.pdf [file 12859_2008_2816_MOESM9_ESM.pdf]

**Table A-9: Anaerobic mixed-acid fermentation genes ranked by *amss* scoring function**The rank fraction (in *pct*) and the gene loci of the prioritised rank by *amss* scoring function in the EC-K12 genome.

| Gene                                      | Gene product                                                     | Locus | <i>pct</i> |
|-------------------------------------------|------------------------------------------------------------------|-------|------------|
| Genes specific to mixed-acid fermentation |                                                                  |       |            |
| Pyruvate formate-lyase complex            |                                                                  |       |            |
| <i>pflA</i>                               | pyruvate formate-lyase activating enzyme [E.C. 1.97.1.4]         | b0902 | 0.19       |
| <i>pflB</i>                               | pyruvate formate lyase I [E.C. 2.3.1.54]                         | b0903 | 0.15       |
| <i>pflD</i>                               | formate C-acetyltransferase [E.C. 2.3.1.54]                      | b3951 | 0.17       |
| <i>tdcE</i>                               | pyruvate formate-lyase 4/2-ketobutyrate formate-lyase            | b3114 | 0.05       |
| <i>pflC</i>                               | pyruvate formate lyase II activase                               | b3952 | 0.07       |
| <i>ybiY</i>                               | predicted pyruvate formate lyase activating enzyme               | b0824 | 0.07       |
| <i>yijW</i>                               | predicted pyruvate formate lyase activating enzyme               | b4379 | 0.07       |
| <i>ybiW</i>                               | predicted pyruvate formate lyase                                 | b0823 | 0.22       |
| <i>yfiD</i>                               | pyruvate formate lyase subunit                                   | b2579 | 0.27       |
| Acetate formation                         |                                                                  |       |            |
| <i>pta</i>                                | phosphate acetyltransferase [E.C. 2.3.1.8]                       | b2297 | 12.03      |
| <i>ackA</i>                               | acetate kinase [E.C. 3.6.1.7]                                    | b2296 | 2.08       |
| Ethanol and lactate formation             |                                                                  |       |            |
| <i>adhE</i>                               | alcohol / acetaldehyde dehydrogenase [E.C. 1.1.1.1 and 1.2.1.10] | b1241 | 2.06       |
| <i>ldhA</i>                               | D-lactate dehydrogenase (NAD dependent) [E.C. 1.1.1.28]          | b1380 | 66.28      |
| Formate hydrogenlyase complex             |                                                                  |       |            |
| <i>hycA</i>                               | regulator of the transcriptional regulator FhlA                  | b2725 | 30.19      |
| <i>hycB</i>                               | hydrogenase 3, Fe-S subunit                                      | b2724 | 10.34      |
| <i>hycC</i>                               | hydrogenase 3, membrane subunit                                  | b2723 | 99.27      |
| <i>hycD</i>                               | hydrogenase 3, membrane subunit                                  | b2722 | 99.71      |
| <i>hycE</i>                               | hydrogenase 3, large subunit                                     | b2721 | 99.83      |
| <i>hycF</i>                               | formate hydrogenlyase complex iron-sulfur protein                | b2720 | 99.69      |
| <i>hycG</i>                               | hydrogenase 3 and formate hydrogenase complex, HycG subunit      | b2719 | 99.93      |

*(Continue on next page)*

| Gene                                      | Gene product                                                           | Locus | <i>pct</i> |
|-------------------------------------------|------------------------------------------------------------------------|-------|------------|
| <i>hycH</i>                               | protein required for maturation of hydrogenase 3                       | b2718 | 21.98      |
| <i>hycI</i>                               | protease involved in processing C-terminal end of HycE                 | b2717 | 23.00      |
| <i>fdhD</i>                               | formate dehydrogenase formation protein                                | b3895 | 70.61      |
| <i>fdhE</i>                               | formate dehydrogenase formation protein                                | b3891 | 15.47      |
| <i>fdhF</i>                               | formate dehydrogenase-H, selenopolypeptide subunit                     | b4079 | 88.31      |
| Fumarate/Succinate formation              |                                                                        |       |            |
| <i>frdA</i>                               | fumarate reductase (anaerobic) catalytic and NAD/ flavoprotein subunit | b4154 | 93.00      |
| <i>frdB</i>                               | fumarate reductase (anaerobic), Fe-S subunit                           | b4153 | 99.15      |
| <i>frdC</i>                               | fumarate reductase (anaerobic), membrane anchor subunit                | b4152 | 10.38      |
| <i>frdD</i>                               | fumarate reductase (anaerobic), membrane anchor subunit                | b4151 | 7.84       |
| Genes that also share with other pathways |                                                                        |       |            |
| Pyruvate kinases                          |                                                                        |       |            |
| <i>pykF</i>                               | pyruvate kinase I                                                      | b1676 | 41.06      |
| <i>pykA</i>                               | pyruvate kinase II                                                     | b1854 | 41.06      |
| <i>ppc</i>                                | phosphoenolpyruvate carboxylase                                        | b3956 | 57.15      |
| Fumarate/Succinate formation              |                                                                        |       |            |
| <i>mdh</i>                                | malate dehydrogenase, NAD(P)-binding                                   | b3236 | 2.35       |
| <i>fumA</i>                               | fumarate hydratase (fumarase A), aerobic Class I                       | b1612 | 61.49      |
| <i>fumB</i>                               | anaerobic class I fumarate hydratase (fumarase B)                      | b4122 | 61.49      |
| <i>fumC</i>                               | fumarate hydratase (fumarase C), aerobic Class II                      | b1611 | 95.59      |
| Ethanol and Lactate formation             |                                                                        |       |            |
| <i>lldD</i>                               | FMN- linked L-lactate dehydrogenase                                    | b3605 | 91.77      |
| <i>adhP</i>                               | ethanol-active dehydrogenase/acetaldehyde-active reductase             | b1478 | 87.9       |

*(End of table)*
