# Supplementary material for: In silico prioritisation of candidate genes for prokaryotic gene function discovery: an application of phylogenetic profiles
Source: Springer Nature journal article supplement (doi:10.1186/1471-2105-10-86), 2009-03-17
Supplement: 12859_2008_2816_MOESM10_ESM.pdf [file 12859_2008_2816_MOESM10_ESM.pdf]

**Table A-10: Gene rank produced by amss scoring function (anaerobic mixed-acid fermentation)**

The rank position, rank fraction (in *pct*), cluster of orthologous groups (COG), and the loci of the prioritised rank by *amss* scoring function in the EC-K12 genome.

| Rank | <i>pct</i> | Score | COG | Gene        | Locus | Function                                                                              |
|------|------------|-------|-----|-------------|-------|---------------------------------------------------------------------------------------|
| 1    | 0.02       | 0.806 | F   | <i>nrdD</i> | b4238 | anaerobic ribonucleoside-triphosphate reductase                                       |
| 2    | 0.05       | 0.806 | C   | <i>tdcE</i> | b3114 | pyruvate formate-lyase 4/2-ketobutyrate formate-lyase                                 |
| 3    | 0.07       | 0.805 | O   | <i>ybiY</i> | b0824 | predicted pyruvate formate lyase activating enzyme                                    |
| 3    | 0.07       | 0.805 | O   | <i>pflC</i> | b3952 | pyruvate formate lyase II activase                                                    |
| 3    | 0.07       | 0.805 | O   | <i>yjyW</i> | b4379 | predicted pyruvate formate lyase activating enzyme                                    |
| 6    | 0.15       | 0.803 | C   | <i>pflB</i> | b0903 | pyruvate formate lyase I                                                              |
| 7    | 0.17       | 0.802 | C   | <i>pflD</i> | b3951 | predicted formate acetyltransferase 2 (pyruvate formate lyase II)                     |
| 8    | 0.19       | 0.797 | O   | <i>pflA</i> | b0902 | pyruvate formate lyase activating enzyme 1                                            |
| 9    | 0.22       | 0.787 | C   | <i>ybiW</i> | b0823 | predicted pyruvate formate lyase                                                      |
| 10   | 0.24       | 0.781 | O   | <i>nrdG</i> | b4237 | anaerobic ribonucleotide reductase activating protein                                 |
| 11   | 0.27       | 0.781 | R   | <i>yfiD</i> | b2579 | pyruvate formate lyase subunit                                                        |
| 12   | 0.29       | 0.774 | R   | <i>yhcC</i> | b3211 | predicted Fe-S oxidoreductase                                                         |
| 13   | 0.31       | 0.765 | R   | <i>ybhA</i> | b0766 | predicted hydrolase                                                                   |
| 14   | 0.34       | 0.757 | E   | <i>pepT</i> | b1127 | peptidase T                                                                           |
| 15   | 0.36       | 0.748 | G   | <i>nagE</i> | b0679 | fused <i>N</i> -acetyl glucosamine specific PTS enzyme: IIC, IIB , and IIA components |
| 15   | 0.36       | 0.748 |     | <i>crr</i>  | b2417 | glucose-specific enzyme IIA component of PTS                                          |
| 15   | 0.36       | 0.748 | G   | <i>bglF</i> | b3722 | fused beta-glucoside-specific PTS enzymes: IIA component/IIB component/IIC component  |
| 18   | 0.44       | 0.746 | G   | <i>treB</i> | b4240 | fused trehalose(maltose)-specific PTS enzyme: IIB component/IIC component             |
| 19   | 0.46       | 0.744 | G   | <i>murP</i> | b2429 | fused predicted PTS enzymes: IIB component/IIC component                              |
| 20   | 0.48       | 0.737 | G   | <i>ascF</i> | b2715 | fused cellobiose/arbutin/salicin-specific PTS enzymes: IIB component/IC component     |

(Continue on next page)

| Rank | <i>pct</i> | Score | COG | Gene        | Locus | Function                                                                        |
|------|------------|-------|-----|-------------|-------|---------------------------------------------------------------------------------|
| 21   | 0.51       | 0.734 | P   | <i>thiI</i> | b0423 | sulfurtransferase required for thiamine and 4-thiouridine biosynthesis          |
| 22   | 0.53       | 0.733 | G   | <i>ptsH</i> | b2415 | phosphohistidinoprotein-hexose phosphotransferase component of PTS system (Hpr) |
| 23   | 0.56       | 0.732 | E   | <i>brnQ</i> | b0401 | predicted branched chain amino acid transporter (LIV-II)                        |
| 24   | 0.58       | 0.725 | F   | <i>deoD</i> | b4384 | purine-nucleoside phosphorylase                                                 |
| 25   | 0.61       | 0.721 | R   | <i>ybiV</i> | b0822 | predicted hydrolase                                                             |
| 26   | 0.63       | 0.721 | G   | <i>nagB</i> | b0678 | glucosamine-6-phosphate deaminase                                               |
| 27   | 0.65       | 0.718 | P   | <i>nirC</i> | b3367 | nitrite transporter                                                             |
| 28   | 0.68       | 0.715 | G   | <i>chbC</i> | b1737 | <i>N,N'</i> -diacetylchitobiose-specific enzyme IIC component of PTS            |
| 29   | 0.70       | 0.714 |     | <i>manZ</i> | b1819 | mannose-specific enzyme IID component of PTS                                    |
| 29   | 0.70       | 0.714 |     | <i>agaV</i> | b3133 | <i>N</i> -acetylgalactosamine-specific enzyme IIB component of PTS              |
| 31   | 0.75       | 0.713 | R   | <i>cof</i>  | b0446 | thiamin pyrimidine pyrophosphate hydrolase                                      |
| 32   | 0.77       | 0.711 | S   | <i>yjjP</i> | b4364 | predicted inner membrane protein                                                |
| 33   | 0.80       | 0.710 | P   | <i>focB</i> | b2492 | predicted formate transporter                                                   |
| 34   | 0.82       | 0.710 |     | <i>luxS</i> | b2687 | S-ribosylhomocysteinase                                                         |
| 35   | 0.85       | 0.709 |     | <i>agaD</i> | b3140 | <i>N</i> -acetylgalactosamine-specific enzyme IID component of PTS              |
| 36   | 0.87       | 0.708 | G   | <i>agaI</i> | b3141 | galactosamine-6-phosphate isomerase                                             |
| 37   | 0.90       | 0.707 |     | <i>manY</i> | b1818 | mannose-specific enzyme IIC component of PTS                                    |
| 38   | 0.92       | 0.707 | GT  | <i>ulaC</i> | b4195 | L-ascorbate-specific enzyme IIA component of PTS                                |
| 39   | 0.94       | 0.707 |     | <i>ulaA</i> | b4193 | L-ascorbate-specific enzyme IIC component of PTS                                |
| 40   | 0.97       | 0.706 |     | <i>agaB</i> | b3138 | <i>N</i> -acetylgalactosamine-specific enzyme IIB component of PTS              |

(End of table)
