# Supplementary material for: In silico prioritisation of candidate genes for prokaryotic gene function discovery: an application of phylogenetic profiles
Source: Springer Nature journal article supplement (doi:10.1186/1471-2105-10-86), 2009-03-17
Supplement: 12859_2008_2816_MOESM11_ESM.pdf [file 12859_2008_2816_MOESM11_ESM.pdf]

**Table A-11: Stratified cross-validation results of inductive CGP algorithms on 31 selected KEGG pathways**

Table 1: Case study 3: cross-validation results of inductive CGP algorithms on 31 selected KEGG pathways

| KEGG pathway or functional group                            | Algorithms |              |               |              |            |              |              |
|-------------------------------------------------------------|------------|--------------|---------------|--------------|------------|--------------|--------------|
|                                                             | <i>NB</i>  | <i>LR</i>    | <i>ADTree</i> | <i>IBk</i>   | <i>J48</i> | <i>SVM/P</i> | <i>SVM/R</i> |
| ABC transporters - General                                  | 0.754      | 0.861        | 0.873         | <b>0.914</b> | 0.824      | 0.912        | 0.905        |
| Alanine and aspartate metabolism                            | 0.802      | 0.737        | 0.770         | 0.737        | 0.785      | 0.795        | <b>0.809</b> |
| Aminoacyl-tRNA biosynthesis                                 | 0.886      | 0.928        | <b>0.960</b>  | 0.905        | 0.926      | 0.929        | 0.893        |
| Aminosugars metabolism                                      | 0.725      | 0.674        | <b>0.923</b>  | 0.827        | 0.639      | 0.899        | 0.762        |
| Arginine and proline metabolism                             | 0.766      | <b>0.962</b> | 0.907         | 0.875        | 0.821      | 0.935        | 0.943        |
| Butanoate metabolism                                        | 0.589      | 0.750        | 0.681         | 0.765        | 0.563      | 0.671        | <b>0.784</b> |
| Carbon fixation                                             | 0.789      | 0.724        | 0.764         | <b>0.799</b> | 0.715      | 0.791        | 0.728        |
| DNA replication                                             | 0.790      | 0.789        | 0.853         | 0.810        | 0.854      | <b>0.860</b> | 0.791        |
| Fatty acid biosynthesis                                     | 0.893      | 0.989        | <b>0.994</b>  | 0.974        | 0.776      | 0.988        | 0.857        |
| Folate biosynthesis                                         | 0.751      | 0.787        | 0.849         | <b>0.861</b> | 0.607      | 0.836        | 0.812        |
| Fructose and mannose metabolism                             | 0.656      | 0.524        | 0.723         | <b>0.795</b> | 0.632      | 0.787        | 0.626        |
| Galactose metabolism                                        | 0.643      | 0.742        | 0.791         | 0.811        | 0.743      | <b>0.875</b> | 0.831        |
| Glutamate metabolism                                        | 0.766      | 0.767        | 0.810         | <b>0.872</b> | 0.746      | 0.802        | 0.797        |
| Glycine and serine and threonine metabolism                 | 0.746      | 0.772        | <b>0.843</b>  | 0.755        | 0.730      | 0.802        | 0.812        |
| Glycolysis / Gluconeogenesis                                | 0.752      | 0.879        | <b>0.908</b>  | 0.873        | 0.808      | 0.894        | 0.879        |
| Methionine metabolism                                       | 0.739      | 0.846        | 0.812         | 0.753        | 0.777      | <b>0.858</b> | 0.793        |
| Oxidative phosphorylation                                   | 0.666      | 0.740        | 0.785         | <b>0.906</b> | 0.720      | 0.806        | 0.751        |
| Pentose and glucuronate interconversions                    | 0.803      | 0.720        | 0.919         | 0.933        | 0.721      | <b>0.939</b> | 0.808        |
| Pentose phosphate pathway                                   | 0.717      | 0.795        | 0.898         | <b>0.948</b> | 0.737      | 0.894        | 0.852        |
| Peptidoglycan biosynthesis                                  | 0.760      | 0.882        | 0.853         | 0.902        | 0.653      | 0.757        | <b>0.940</b> |
| Phenylalanine and tyrosine and tryptophan biosynthesis      | 0.709      | 0.663        | 0.668         | 0.715        | 0.621      | 0.682        | <b>0.729</b> |
| Phosphotransferase system (PTS)                             | 0.883      | 0.949        | 0.962         | 0.961        | 0.864      | <b>0.990</b> | 0.975        |
| Propanoate metabolism                                       | 0.739      | 0.969        | <b>0.985</b>  | 0.964        | 0.675      | 0.905        | 0.919        |
| Protein export                                              | 0.646      | 0.788        | 0.745         | 0.692        | 0.646      | <b>0.857</b> | 0.749        |
| Purine metabolism                                           | 0.740      | 0.776        | 0.789         | <b>0.813</b> | 0.783      | 0.797        | 0.791        |
| Pyrimidine metabolism                                       | 0.761      | 0.666        | <b>0.816</b>  | 0.741        | 0.678      | 0.713        | 0.718        |
| Pyruvate metabolism                                         | 0.749      | 0.789        | 0.853         | 0.844        | 0.503      | <b>0.868</b> | 0.824        |
| Starch and sucrose metabolism                               | 0.792      | 0.738        | 0.766         | <b>0.866</b> | 0.746      | 0.858        | 0.772        |
| Two-component system - General                              | 0.783      | 0.698        | 0.772         | 0.772        | 0.723      | <b>0.893</b> | 0.840        |
| Tyrosine metabolism                                         | 0.760      | 0.806        | 0.693         | <b>0.936</b> | 0.654      | 0.727        | 0.832        |
| Ribosome                                                    | 0.794      | 0.851        | <b>0.930</b>  | 0.897        | 0.812      | 0.910        | 0.922        |
| Number of pathways in which the algorithm achieved best AUC | 0          | 1            | 8             | 10           | 0          | 8            | 4            |

Values shown in this table are the areas under ROC curves. The **bold** values indicated the best AUC was achieved by the algorithm in the pathway evaluated. *NB*: naïve Bayes classifier; *LR*: logistic regression; *ADTree*: alternating decision tree; *IBk*: *k*-nearest neighbour; *J48*: J48 decision tree; *SVM*: support vector machine; *SVM/P*: SVM with polynomial kernel; *SVM/R*: SVM with radial basis kernel.
