# Supplementary material for: In silico prioritisation of candidate genes for prokaryotic gene function discovery: an application of phylogenetic profiles
Source: Springer Nature journal article supplement (doi:10.1186/1471-2105-10-86), 2009-03-17
Supplement: 12859_2008_2816_MOESM12_ESM.pdf [file 12859_2008_2816_MOESM12_ESM.pdf]

## Additional file A-13 - CGP performance on peptidoglycan-related genes on *Prochlorococcus marinus* MIT9313

### Motivation and Methods

In Case study 1, both statistical and inductive CGP methods were evaluated on genes of *Streptococcus agalactiae* 2603 V/R (SA-2603) and *Escherichia coli* K-12 (EC-K12) genomes with a large collection of genome examples incorporating the phyla of Firmicutes (99) and Proteobacteria (222). It is unclear whether the CGP results were favorably biased by the overrepresentation of these genome examples. To investigate the possible bias, an additional experiment was designed to rank genes from the *Prochlorococcus marinus* MIT9313 genomes (PM-MIT9313, 2,269 genes) with all Cyanobacteria genomes removed from the 400 positive genome examples (including all *Anabaena* spp., *Gloeobacter* spp., *Nostoc* spp., *Prochlorococcus* spp., *Synechococcus* spp., *Synechocystis* spp., *Thermosynechococcus* spp., and *Trichodesmium* spp.). The determination of occurrence matrix, statistical CGP scoring functions, inductive CGP algorithms, and evaluation methodology were identical to Case study 1.

### Results

For statistical CGP, the best performing scoring function was *hmss* with high AUC (best AUC: *C*: 0.988, *B*: 0.971, *M*: 0.969). Good inductive CGP performance as measured by AUC were also obtained (*C*:0.999 by *ADTree*; *B*: 0.954 by *SVM/Poly*; *M*: 0.986 by *SVM/Poly*).

### Discussion

This experiment attempted to prioritise PM-MIT9313 for discovering genes responsible for peptidoglycan metabolism *without* the representative genomes from the phylum Cyanobacteria. The high AUCs achieved by both methods were similar to the corresponding CGP tasks in SA-2603 and EC-K12 genomes. These results demonstrated that good CGP performances were obtainable by selecting positive genome examples from either closely- or distantly-related genomes.

Table 1: CGP performance on peptidoglycan-related genes (*Prochlorococcus marinus* MIT9313, 2269 genes)

| Methods                                     | Validation sets |                           |        |                           |        |                           |
|---------------------------------------------|-----------------|---------------------------|--------|---------------------------|--------|---------------------------|
|                                             | C (8)           |                           | B (23) |                           | M (30) |                           |
|                                             | AUC             | $(\bar{\eta}/\eta_{max})$ | AUC    | $(\bar{\eta}/\eta_{max})$ | AUC    | $(\bar{\eta}/\eta_{max})$ |
| Statistical CGP (scoring functions)         |                 |                           |        |                           |        |                           |
| <i>sens</i>                                 | 0.887           | (2.2/6.65)                | 0.867  | (2.0/4.93)                | 0.858  | (2.0/4.44)                |
| <i>spec</i>                                 | 0.262           | (0.3/1.33)                | 0.331  | (0.5/1.18)                | 0.381  | (0.7/1.18)                |
| <i>ppv</i>                                  | 0.527           | (0.8/1.96)                | 0.594  | (1.4/24.7)                | 0.641  | (1.5/37.8)                |
| <i>npv</i>                                  | 0.970           | (3.6/25.2)                | 0.953  | (3.2/16.4)                | 0.946  | (3.1/15.1)                |
| <i>amss</i>                                 | 0.987           | (4.6/75.6)                | 0.970  | (4.0/41.5)                | 0.969  | (4.0/43.8)                |
| <i>hmss</i>                                 | 0.988           | (4.8/87.3)                | 0.971  | (4.0/45.5)                | 0.969  | (4.0/47.3)                |
| <i>OR</i>                                   | 0.521           | (0.7/1.96)                | 0.593  | (1.4/24.7)                | 0.638  | (1.4/37.8)                |
| <i>chisq</i>                                | 0.980           | (4.1/42.2)                | 0.963  | (3.6/23.1)                | 0.957  | (3.5/20.9)                |
| <i>bchisq</i>                               | 0.980           | (4.1/42.2)                | 0.963  | (3.6/23.1)                | 0.957  | (3.5/20.9)                |
| <i>F</i>                                    | 0.943           | (3.3/29.9)                | 0.906  | (2.8/16.4)                | 0.894  | (2.7/15.1)                |
| Inductive CGP (machine learning algorithms) |                 |                           |        |                           |        |                           |
| <i>NB</i>                                   | 0.919           |                           | 0.878  |                           | 0.872  |                           |
| <i>LR</i>                                   | 0.968           |                           | 0.819  |                           | 0.877  |                           |
| <i>ADTree</i>                               | 0.999           |                           | 0.921  |                           | 0.915  |                           |
| <i>IBk</i>                                  | 0.833           |                           | 0.952  |                           | 0.960  |                           |
| <i>J48</i>                                  | 0.993           |                           | 0.818  |                           | 0.705  |                           |
| <i>SMO/Poly</i>                             | 0.937           |                           | 0.954  |                           | 0.986  |                           |
| <i>SMO/RBF</i>                              | 0.995           |                           | 0.898  |                           | 0.855  |                           |

## Genome examples selected for the statistical CGP experiment

### Positive genome examples (378)

|                                                 |                                                      |
|-------------------------------------------------|------------------------------------------------------|
| Acidobacteria bacterium Ellin345                | Bordetella parapertussis                             |
| Acidothermus cellulolyticus 11B                 | Bordetella pertussis                                 |
| Acidovorax JS42                                 | Borrelia afzelii PKo                                 |
| Acidovorax avenae citrulli AAC00-1              | Borrelia burgdorferi                                 |
| Acinetobacter sp ADP1                           | Borrelia garinii PBi                                 |
| Aeromonas hydrophila ATCC 7966                  | Bradyrhizobium japonicum                             |
| Agrobacterium tumefaciens C58 UWash             | Brucella abortus 9-941                               |
| Alcanivorax borkumensis SK2                     | Brucella melitensis                                  |
| Alkalilimnicola ehrlichei MLHE-1                | Brucella melitensis biovar Abortus                   |
| Anabaena variabilis ATCC 29413                  | Brucella suis 1330                                   |
| Anaeromyxobacter dehalogenans 2CP-C             | Buchnera aphidicola                                  |
| Aquifex aeolicus                                | Buchnera aphidicola Cc Cinara cedri                  |
| Arthrobacter FB24                               | Buchnera aphidicola Sg                               |
| Arthrobacter aurescens TC1                      | Buchnera sp                                          |
| Azoarcus BH72                                   | Burkholderia 383                                     |
| Azoarcus sp EbN1                                | Burkholderia cenocepacia AU 1054                     |
| Bacillus anthracis Ames                         | Burkholderia cenocepacia HI2424                      |
| Bacillus anthracis Ames 0581                    | Burkholderia cepacia AMMD                            |
| Bacillus anthracis str Sterne                   | Burkholderia mallei ATCC 23344                       |
| Bacillus cereus ATCC14579                       | Burkholderia mallei NCTC 10229                       |
| Bacillus cereus ATCC 10987                      | Burkholderia mallei SAVP1                            |
| Bacillus cereus ZK                              | Burkholderia pseudomallei 1710b                      |
| Bacillus clausii KSM-K16                        | Burkholderia pseudomallei K96243                     |
| Bacillus halodurans                             | Burkholderia thailandensis E264                      |
| Bacillus licheniformis DSM 13                   | Burkholderia xenovorans LB400                        |
| Bacillus subtilis                               | Campylobacter fetus 82-40                            |
| Bacillus thuringiensis Al Hakam                 | Campylobacter jejuni                                 |
| Bacillus thuringiensis konkukian                | Campylobacter jejuni RM1221                          |
| Bacteroides fragilis NCTC 9434                  | Candidatus Blochmannia floridanus                    |
| Bacteroides fragilis YCH46                      | Candidatus Blochmannia pennsylvanicus                |
| Bacteroides thetaiotaomicron VPI-5482           | BPEN                                                 |
| Bartonella bacilliformis KC583                  | Candidatus Carsonella ruddii                         |
| Bartonella henselae Houston-1                   | Candidatus Pelagibacter ubique HTCC1062              |
| Bartonella quintana Toulouse                    | Candidatus Ruthia magnifica Cm Calyptogena magnifica |
| Baumannia cicadellinicola Homalodisca coagulata | Carboxydotherrmus hydrogenoformans Z-2901            |
| Bdellovibrio bacteriovorus                      | Caulobacter crescentus                               |
| Bifidobacterium adolescentis ATCC 15703         | Chlamydia muridarum                                  |
| Bifidobacterium longum                          | Chlamydia trachomatis                                |
| Bordetella bronchiseptica                       | Chlamydia trachomatis A HAR-13                       |
|                                                 | Chlamydomphila abortus S26 3                         |

*Chlamydophila caviae*  
*Chlamydophila felis* Fe C-56  
*Chlamydophila pneumoniae* AR39  
*Chlamydophila pneumoniae* CWL029  
*Chlamydophila pneumoniae* J138  
*Chlamydophila pneumoniae* TW 183  
*Chlorobium chlorochromatii* CaD3  
*Chlorobium phaeobacteroides* DSM 266  
*Chlorobium tepidum* TLS  
*Chromobacterium violaceum*  
*Chromohalobacter salexigens* DSM 3043  
*Clostridium acetobutylicum*  
*Clostridium novyi* NT  
*Clostridium perfringens*  
*Clostridium perfringens* ATCC 13124  
*Clostridium perfringens* SM101  
*Clostridium tetani* E88  
*Clostridium thermocellum* ATCC 27405  
*Colwellia psychrerythraea* 34H  
*Corynebacterium diphtheriae*  
*Corynebacterium efficiens* YS-314  
*Corynebacterium glutamicum* ATCC 13032  
Bielefeld  
*Corynebacterium jeikeium* K411  
*Coxiella burnetii*  
*Cytophaga hutchinsonii* ATCC 33406  
*Dechloromonas aromatica* RCB  
*Dehalococcoides* CBDB1  
*Dehalococcoides ethenogenes* 195  
*Deinococcus geothermalis* DSM 11300  
*Deinococcus radiodurans*  
*Desulfitobacterium hafniense* Y51  
*Desulfotalea psychrophila* LSv54  
*Desulfovibrio desulfuricans* G20  
*Desulfovibrio vulgaris* DP4  
*Desulfovibrio vulgaris* Hildenborough  
*Ehrlichia canis* Jake  
*Ehrlichia chaffeensis* Arkansas  
*Ehrlichia ruminantium* Gardel  
*Ehrlichia ruminantium* str. Welgevonden  
*Enterococcus faecalis* V583  
*Erwinia carotovora* atroseptica SCRI1043  
*Erythrobacter litoralis* HTCC2594  
*Escherichia coli* 536  
*Escherichia coli* APEC O1  
*Escherichia coli* CFT073  
*Escherichia coli* K12  
*Escherichia coli* O157H7  
*Escherichia coli* O157H7 EDL933  
*Escherichia coli* UTI89  
*Escherichia coli* W3110  
*Francisella tularensis* FSC 198  
*Francisella tularensis* holarctica  
*Francisella tularensis* holarctica OSU18  
*Francisella tularensis* novicida U112  
*Francisella tularensis* tularensis  
*Frankia* CcI3  
*Frankia alni* ACN14a  
*Fusobacterium nucleatum*  
*Geobacillus kaustophilus* HTA426  
*Geobacter metallireducens* GS-15  
*Geobacter sulfurreducens*  
*Gluconobacter oxydans* 621H  
*Gramella forsetii* KT0803  
*Granulobacter bethesdensis* CGDNIH1  
*Haemophilus ducreyi* 35000HP  
*Haemophilus influenzae*  
*Haemophilus influenzae* 86 028NP  
*Haemophilus somnus* 129PT  
*Hahella chejuensis* KCTC 2396  
*Halorhodospira halophila* SL1  
*Helicobacter acinonychis* Sheeba  
*Helicobacter hepaticus*  
*Helicobacter pylori* 26695  
*Helicobacter pylori* HPAG1  
*Helicobacter pylori* J99  
*Hyphomonas neptunium* ATCC 15444  
*Idiomarina loihiensis* L2TR  
*Jannaschia* CCS1  
*Lactobacillus acidophilus* NCFM  
*Lactobacillus brevis* ATCC 367  
*Lactobacillus casei* ATCC 334  
*Lactobacillus delbrueckii* bulgaricus  
*Lactobacillus delbrueckii* bulgaricus ATCC BAA-365  
*Lactobacillus gasseri* ATCC 33323  
*Lactobacillus johnsonii* NCC 533  
*Lactobacillus plantarum*  
*Lactobacillus sakei* 23K  
*Lactobacillus salivarius* UCC118  
*Lactococcus lactis*  
*Lactococcus lactis* cremoris MG1363

*Lactococcus lactis cremoris* SK11  
*Lawsonia intracellularis* PHE MN1-00  
*Legionella pneumophila* Lens  
*Legionella pneumophila* Paris  
*Legionella pneumophila* Philadelphia 1  
*Leifsonia xyli xyli* CTCB0  
*Leptospira borgpetersenii* serovar Hardjovobis JB197  
*Leptospira borgpetersenii* serovar Hardjovobis L550  
*Leptospira interrogans* serovar Copenhageni  
*Leptospira interrogans* serovar Lai  
*Leuconostoc mesenteroides* ATCC 8293  
*Listeria innocua*  
*Listeria monocytogenes*  
*Listeria monocytogenes* 4b F2365  
*Listeria welshimeri* serovar 6b SLCC5334  
*Magnetococcus* MC-1  
*Magnetospirillum magneticum* AMB-1  
*Mannheimia succiniciproducens* MBEL55E  
*Maricaulis maris* MCS10  
*Marinobacter aquaeolei* VT8  
*Mesorhizobium* BNC1  
*Mesorhizobium loti*  
*Methylibium petroleiphilum* PM1  
*Methylobacillus flagellatus* KT  
*Methylococcus capsulatus* Bath  
*Moorella thermoacetica* ATCC 39073  
*Mycobacterium* KMS  
*Mycobacterium* MCS  
*Mycobacterium avium* 104  
*Mycobacterium avium* paratuberculosis  
*Mycobacterium bovis*  
*Mycobacterium bovis* BCG Pasteur 1173P2  
*Mycobacterium leprae*  
*Mycobacterium smegmatis* MC2 155  
*Mycobacterium tuberculosis* CDC1551  
*Mycobacterium tuberculosis* H37Rv  
*Mycobacterium ulcerans* Agy99  
*Mycobacterium vanbaalenii* PYR-1  
*Myxococcus xanthus* DK 1622  
*Neisseria gonorrhoeae* FA 1090  
*Neisseria meningitidis* FAM18  
*Neisseria meningitidis* MC58  
*Neisseria meningitidis* Z2491  
*Neorickettsia sennetsu* Miyayama  
*Nitrobacter hamburgensis* X14  
*Nitrobacter winogradskyi* Nb-255  
*Nitrosococcus oceani* ATCC 19707  
*Nitrosomonas europaea*  
*Nitrosomonas eutropha* C71  
*Nitrospira multififormis* ATCC 25196  
*Nocardia farcinica* IFM10152  
*Nocardioides* JS614  
*Novosphingobium aromaticivorans* DSM 12444  
*Oceanobacillus iheyensis*  
*Oenococcus oeni* PSU-1  
*Parachlamydia* sp UWE25  
*Paracoccus denitrificans* PD1222  
*Pasteurella multocida*  
*Pediococcus pentosaceus* ATCC 25745  
*Pelobacter carbinolicus*  
*Pelobacter propionicus* DSM 2379  
*Pelodictyon luteolum* DSM 273  
*Photobacterium profundum* SS9  
*Photorhabdus luminescens*  
*Pirellula* sp  
*Polaromonas* JS666  
*Polaromonas naphthalenivorans* CJ2  
*Porphyromonas gingivalis* W83  
*Propionibacterium acnes* KPA171202  
*Pseudoalteromonas atlantica* T6c  
*Pseudoalteromonas haloplanktis* TAC125  
*Pseudomonas aeruginosa*  
*Pseudomonas aeruginosa* UCBPP-PA14  
*Pseudomonas entomophila* L48  
*Pseudomonas fluorescens* Pf-5  
*Pseudomonas fluorescens* PfO-1  
*Pseudomonas putida* KT2440  
*Pseudomonas syringae* phaseolicola 1448A  
*Pseudomonas syringae* pv B728a  
*Pseudomonas syringae* tomato DC3000  
*Psychrobacter arcticum* 273-4  
*Psychrobacter cryohalolentis* K5  
*Psychromonas ingrahamii* 37  
*Ralstonia eutropha* H16  
*Ralstonia eutropha* JMP134  
*Ralstonia metallidurans* CH34  
*Ralstonia solanacearum*  
*Rhizobium etli* CFN 42  
*Rhizobium leguminosarum* bv viciae 3841

*Rhodobacter sphaeroides* 2 4 1  
*Rhodococcus* RHA1  
*Rhodoferax ferrireducens* T118  
*Rhodopseudomonas palustris* BisA53  
*Rhodopseudomonas palustris* BisB18  
*Rhodopseudomonas palustris* BisB5  
*Rhodopseudomonas palustris* CGA009  
*Rhodopseudomonas palustris* HaA2  
*Rhodospirillum rubrum* ATCC 11170  
*Rickettsia bellii* RML369-C  
*Rickettsia conorii*  
*Rickettsia felis* URRWXCa2  
*Rickettsia prowazekii*  
*Rickettsia typhi* wilmington  
*Roseobacter denitrificans* OCh 114  
*Rubrobacter xylanophilus* DSM 9941  
*Saccharophagus degradans* 2-40  
*Salinibacter ruber* DSM 13855  
*Salmonella enterica* Choleraesuis  
*Salmonella enterica* Paratyphi ATCC 9150  
*Salmonella typhi*  
*Salmonella typhi* Ty2  
*Salmonella typhimurium* LT2  
*Shewanella* ANA-3  
*Shewanella* MR-4  
*Shewanella* MR-7  
*Shewanella* W3-18-1  
*Shewanella amazonensis* SB2B  
*Shewanella denitrificans* OS217  
*Shewanella frigidimarina* NCIMB 400  
*Shewanella oneidensis*  
*Shigella boydii* Sb227  
*Shigella dysenteriae*  
*Shigella flexneri* 2a  
*Shigella flexneri* 2a 2457T  
*Shigella flexneri* 5 8401  
*Shigella sonnei* Ss046  
*Silicibacter* TM1040  
*Silicibacter pomeroyi* DSS-3  
*Sinorhizobium meliloti*  
*Sodalis glossinidius* morsitans  
*Solibacter usitatus* Ellin6076  
*Sphingopyxis alaskensis* RB2256  
*Staphylococcus aureus* COL  
*Staphylococcus aureus* MW2  
*Staphylococcus aureus* Mu50  
*Staphylococcus aureus* N315  
*Staphylococcus aureus* NCTC 8325  
*Staphylococcus aureus* RF122  
*Staphylococcus aureus* USA300  
*Staphylococcus aureus aureus* MRSA252  
*Staphylococcus aureus aureus* MSSA476  
*Staphylococcus epidermidis* ATCC 12228  
*Staphylococcus epidermidis* RP62A  
*Staphylococcus haemolyticus*  
*Staphylococcus saprophyticus*  
*Streptococcus agalactiae* 2603  
*Streptococcus agalactiae* A909  
*Streptococcus agalactiae* NEM316  
*Streptococcus mutans*  
*Streptococcus pneumoniae* D39  
*Streptococcus pneumoniae* R6  
*Streptococcus pyogenes* M1 GAS  
*Streptococcus pyogenes* MGAS10270  
*Streptococcus pyogenes* MGAS10394  
*Streptococcus pyogenes* MGAS10750  
*Streptococcus pyogenes* MGAS2096  
*Streptococcus pyogenes* MGAS315  
*Streptococcus pyogenes* MGAS5005  
*Streptococcus pyogenes* MGAS6180  
*Streptococcus pyogenes* MGAS8232  
*Streptococcus pyogenes* MGAS9429  
*Streptococcus pyogenes* SSI-1  
*Streptococcus sanguinis* SK36  
*Streptococcus thermophilus* CNRZ1066  
*Streptococcus thermophilus* LMD-9  
*Streptococcus thermophilus* LMG 18311  
*Streptomyces avermitilis*  
*Streptomyces coelicolor*  
*Symbiobacterium thermophilum* IAM14863  
*Syntrophobacter fumaroxidans* MPOB  
*Syntrophomonas wolfei* Goettingen  
*Syntrophus aciditrophicus* SB  
*Thermoanaerobacter tengcongensis*  
*Thermobifida fusca* YX  
*Thermotoga maritima*  
*Thermus thermophilus* HB27  
*Thermus thermophilus* HB8  
*Thiobacillus denitrificans* ATCC 25259  
*Thiomicrospira crunogena* XCL-2  
*Thiomicrospira denitrificans* ATCC 33889  
*Treponema denticola* ATCC 35405

|                                                   |                                          |
|---------------------------------------------------|------------------------------------------|
| Treponema pallidum                                | Xanthomonas campestris 8004              |
| Tropheryma whipplei TW08 27                       | Xanthomonas campestris vesicatoria 85-10 |
| Tropheryma whipplei Twist                         | Xanthomonas citri                        |
| Verminephrobacter eiseniae EF01-2                 | Xanthomonas oryzae KACC10331             |
| Vibrio cholerae                                   | Xanthomonas oryzae MAFF 311018           |
| Vibrio fischeri ES114                             | Xylella fastidiosa                       |
| Vibrio parahaemolyticus                           | Xylella fastidiosa Temecula1             |
| Vibrio vulnificus CMCP6                           | Yersinia enterocolitica 8081             |
| Vibrio vulnificus YJ016                           | Yersinia pestis Antiqua                  |
| Wigglesworthia brevipalpis                        | Yersinia pestis CO92                     |
| Wolbachia endosymbiont of Brugia malayi           | Yersinia pestis KIM                      |
| TRS                                               | Yersinia pestis Nepal516                 |
| Wolbachia endosymbiont of Drosophila melanogaster | Yersinia pestis biovar Mediaevails       |
| Wolinella succinogenes                            | Yersinia pseudotuberculosis IP32953      |
| Xanthomonas campestris                            | Zymomonas mobilis ZM4                    |

### Negative genome examples (17)

|                                         |                            |
|-----------------------------------------|----------------------------|
| Anaplasma marginale St Maries           | Mycoplasma hyopneumoniae J |
| Anaplasma phagocytophilum HZ            | Mycoplasma mobile 163K     |
| Aster yellows witches-broom phytoplasma | Mycoplasma mycoides        |
| AYWB                                    | Mycoplasma penetrans       |
| Mesoplasma florum L1                    | Mycoplasma pneumoniae      |
| Mycoplasma capricolum ATCC 27343        | Mycoplasma pulmonis        |
| Mycoplasma gallisepticum                | Mycoplasma synoviae 53     |
| Mycoplasma hyopneumoniae 232            | Onion yellows phytoplasma  |
| Mycoplasma hyopneumoniae 7448           | Ureaplasma urealyticum     |
