# Supplementary material for: In silico prioritisation of candidate genes for prokaryotic gene function discovery: an application of phylogenetic profiles
Source: Springer Nature journal article supplement (doi:10.1186/1471-2105-10-86), 2009-03-17
Supplement: 12859_2008_2816_MOESM13_ESM.pdf [file 12859_2008_2816_MOESM13_ESM.pdf]

## Additional file 12 – Sampling bias with validation sets selected from KEGG

In case study 3, there were significant variations in inductive CGP performance between different KEGG pathways. Apart from true indiscriminability of functional categories by phylogenetic profiles, these variations could have been attributed to the *sampling bias* in the validation data sets. KEGG is an useful resource for illustrating the transformation of enzymatic substrates. To depict complex biochemical interactions, it is often required to include neighbouring metabolic pathways in the same pathway map. This may result in mixed gene occurrence profiles which can adversely influence inductive CGP performance.

We manually inspected the worst performing validation set (phenylalanine, tyrosine, and tryptophan biosynthesis pathway, KEGG pathway Id: sag00400), which has genes sharing with 7 (out 81) other functional categories of KEGG. A closer examination revealed that two tRNA synthases genes and alanine/aspartate aminotransferase genes were included in the validation sets. The repeated experiment with the removal of these genes resulted in a significantly improved overall performance (with best AUC of improved from 0.729 to 0.852, Table 1 and 2).

To investigate this effect further, we plotted the extent of gene sharing of different KEGG categories (Figure 1). It was observed that validation sets with few overlaps tend to have better performance (as shown in red, yellow, and blue groups). The validation sets with good AUC [for example, fatty acid biosynthesis (sag00061, AUC: 0.994) and ribosomal genes (sag03010, AUC: 0.930)] have relatively few connections, indicating that only the genes specific to a the function were included. More dense connections were found in pathways that achieved worse AUC (blue and grey groups); although some heavily-connected pathways (for example, the amino-tRNA biosynthesis pathway, sag00970, AUC:

Table 1: Comparison of AUC between the original and processed sag00400 validation sets

| Dataset               | Algorithm |           |               |            |            |              |              |
|-----------------------|-----------|-----------|---------------|------------|------------|--------------|--------------|
|                       | <i>NB</i> | <i>LR</i> | <i>ADTree</i> | <i>IBk</i> | <i>J48</i> | <i>SVM/P</i> | <i>SVM/R</i> |
| Original (sag00400)   | 0.709     | 0.663     | 0.668         | 0.715      | 0.621      | 0.682        | <b>0.729</b> |
| Processed (sag00400m) | 0.684     | 0.652     | 0.664         | 0.773      | 0.669      | <b>0.851</b> | 0.759        |

The values shown in this table are areas under ROC curve. The generalisation performance was estimated by stratified cross-validation for each algorithm (10-fold cross-validation for sag00400, 9-fold for sag00400m).

Table 2: Genes in the original (sag00400) and the processed (sag00400m) phenylalanine, tyrosine and tryptophan biosynthesis KEGG pathway

| Gene locus | Pathway  |           | Gene        | Annotation                                    |
|------------|----------|-----------|-------------|-----------------------------------------------|
|            | sag00400 | sag00400m |             |                                               |
| SAG0158    | ✓        |           | <i>tyrS</i> | tyrosyl-tRNA synthetase                       |
| SAG0462    | ✓        | ✓         | <i>trpG</i> | anthranilate synthase component II            |
| SAG0525    | ✓        |           | <i>aspC</i> | aspartate aminotransferase                    |
| SAG0540    | ✓        | ✓         |             | hypothetical protein                          |
| SAG0630    | ✓        | ✓         | <i>aroA</i> | 3-phosphoshikimate 1-carboxyvinyltransferase  |
| SAG0631    | ✓        | ✓         | <i>aroK</i> | shikimate kinase                              |
| SAG0869    | ✓        |           | <i>pheS</i> | phenylalanyl-tRNA synthetase subunit $\alpha$ |
| SAG0871    | ✓        |           | <i>pheT</i> | phenylalanyl-tRNA synthetase subunit $\beta$  |
| SAG1377    | ✓        | ✓         | <i>aroC</i> | chorismate synthase                           |
| SAG1378    | ✓        | ✓         | <i>aroB</i> | 3-dehydroquinate synthase                     |
| SAG1379    | ✓        | ✓         | <i>aroD</i> | 3-dehydroquinate dehydratase                  |
| SAG1676    | ✓        |           | <i>alaT</i> | aminotransferase AlaT                         |
| SAG1680    | ✓        | ✓         | <i>aroE</i> | shikimate 5-dehydrogenase                     |
| SAG1686    | ✓        | ✓         |             | phospho-2-dehydro-3-heoxyheptonate aldolase   |
| <i>n</i>   | 14       | 9         |             |                                               |

0.960) have distinct molecular functional properties (for example, synthesis amino-tRNAs). In the above example with the sag00400 validation set, removal of tRNA synthase and aminotransferase genes (sag00400m) resulted in a reduction of connections with neighbouring pathways. Such “purification” step led to an improvement in CGP performance.

## Summary

KEGG is a standardised validation source that is frequently used for benchmarking *in silico* methods of gene function discovery. The map-style of gene curation in KEGG implies that a possibility of mixing functionally distinct genes in the same validation set. In the case of CGP by phylogenetic profiles, inclusion of genes from other functional groups may degrade the quality of training data and resulting in loss of performance. Evaluations of functional prediction methods must thus consider the effect of such sampling bias in the data set.

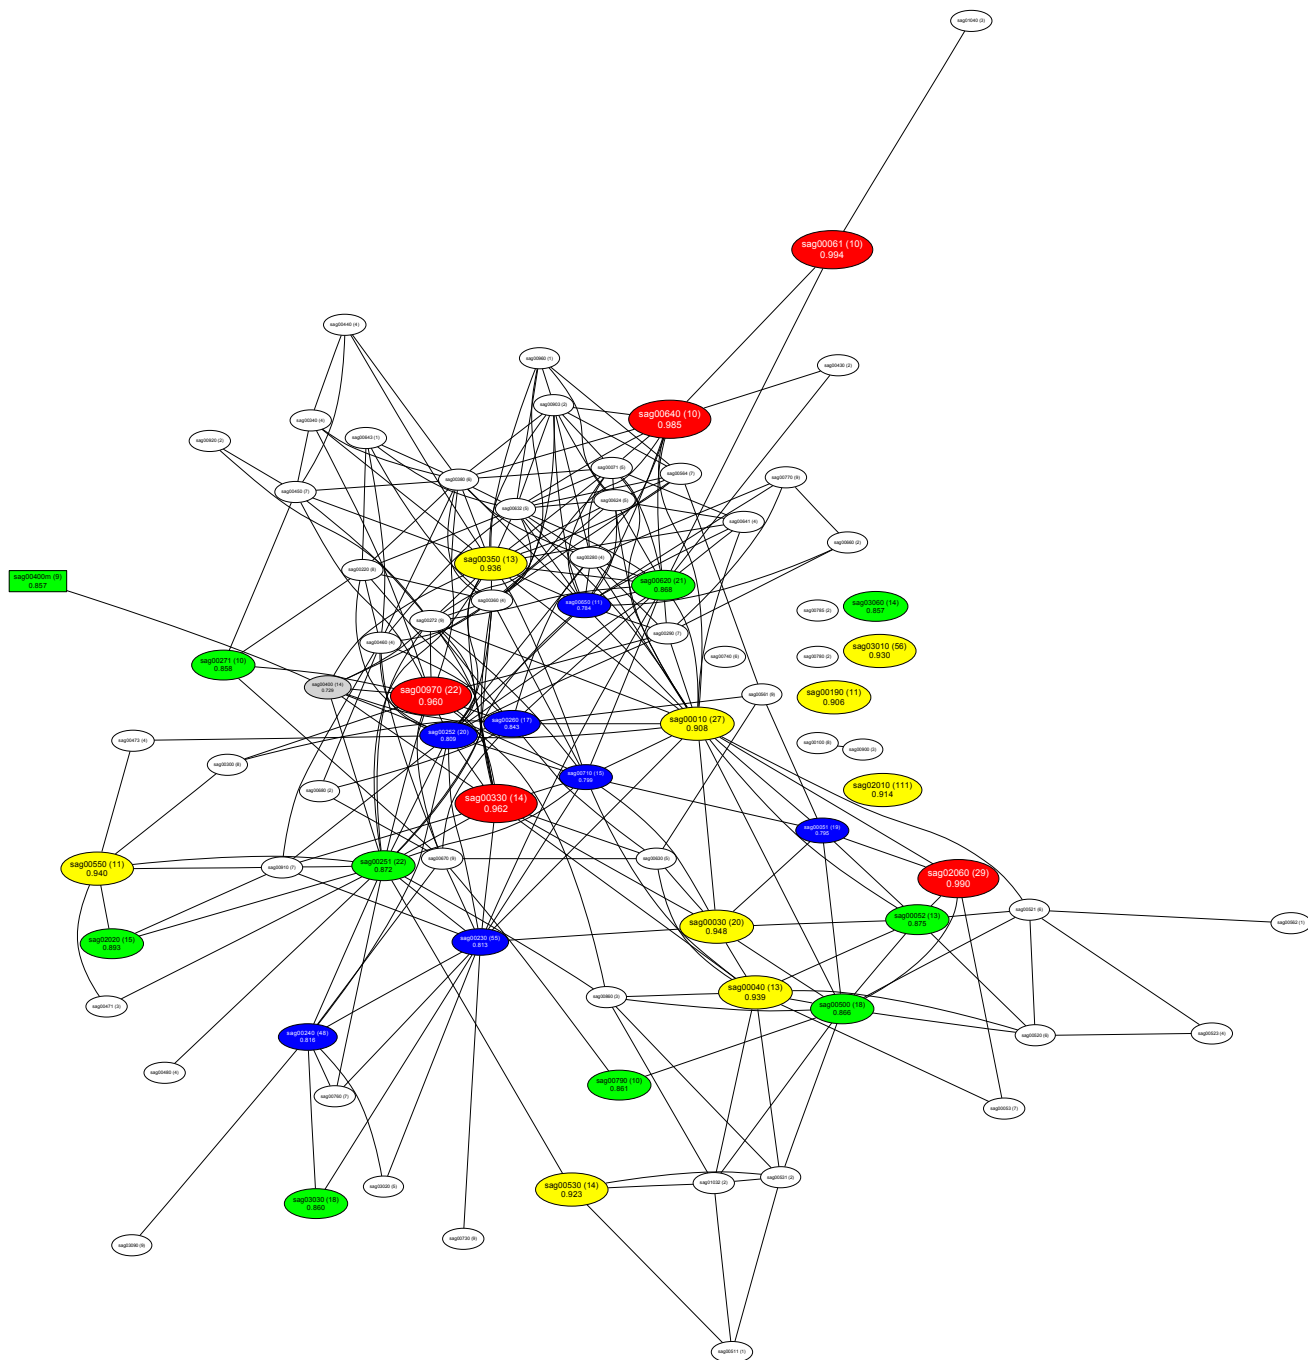

Figure 1: This diagram illustrates the pathways that have shared genes in KEGG. Each node denotes a KEGG functional category, and an edge between nodes indicates that common genes are present in both categories. Pathways with fewer connections are generally associated with better evaluation results, while pathways with poor AUCs are likely to be more heavily interconnected. The original validation set composed of phenylalanine, tyrosine, and tryptophan biosynthesis pathway in KEGG (sag00400, the grey node) contains genes sharing with more neighbouring pathways than the processed validation set (sag00400m, rectangular green node). The pathway names are listed in Table 3. Coloured nodes: red: AUC>0.95; yellow: AUC=0.90–0.95; green: AUC=0.85–0.90; blue: AUC=0.75–0.85; grey: AUC <0.75; White nodes: KEGG pathways with <10 genes in the pathway that (not included in inductive CGP evaluation).

Table 3: KEGG pathway listed in Figure 1

| Id       | Name                                                |
|----------|-----------------------------------------------------|
| sag00010 | Glycolysis / Gluconeogenesis                        |
| sag00030 | Pentose phosphate pathway                           |
| sag00040 | Pentose and glucuronate interconversions            |
| sag00051 | Fructose and mannose metabolism                     |
| sag00052 | Galactose metabolism                                |
| sag00053 | Ascorbate and aldarate metabolism                   |
| sag00061 | Fatty acid biosynthesis                             |
| sag00071 | Fatty acid metabolism                               |
| sag00100 | Biosynthesis of steroids                            |
| sag00190 | Oxidative phosphorylation                           |
| sag00220 | Urea cycle and metabolism of amino groups           |
| sag00230 | Purine metabolism                                   |
| sag00240 | Pyrimidine metabolism                               |
| sag00251 | Glutamate metabolism                                |
| sag00252 | Alanine and aspartate metabolism                    |
| sag00260 | Glycine, serine and threonine metabolism            |
| sag00271 | Methionine metabolism                               |
| sag00272 | Cysteine metabolism                                 |
| sag00280 | Valine, leucine and isoleucine degradation          |
| sag00290 | Valine, leucine and isoleucine biosynthesis         |
| sag00300 | Lysine biosynthesis                                 |
| sag00330 | Arginine and proline metabolism                     |
| sag00340 | Histidine metabolism                                |
| sag00350 | Tyrosine metabolism                                 |
| sag00360 | Phenylalanine metabolism                            |
| sag00380 | Tryptophan metabolism                               |
| sag00400 | Phenylalanine, tyrosine and tryptophan biosynthesis |
| sag00430 | Taurine and hypotaurine metabolism                  |
| sag00440 | Aminophosphonate metabolism                         |
| sag00450 | Selenoamino acid metabolism                         |
| sag00460 | Cyanoamino acid metabolism                          |
| sag00471 | D-Glutamine and D-glutamate metabolism              |
| sag00473 | D-Alanine metabolism                                |
| sag00480 | Glutathione metabolism                              |
| sag00500 | Starch and sucrose metabolism                       |
| sag00511 | N-Glycan degradation                                |
| sag00520 | Nucleotide sugars metabolism                        |
| sag00521 | Streptomycin biosynthesis                           |
| sag00523 | Polyketide sugar unit biosynthesis                  |
| sag00530 | Aminosugars metabolism                              |
| sag00531 | Glycosaminoglycan degradation                       |

(Continue on next page)

| Id       | Name                                    |
|----------|-----------------------------------------|
| sag00550 | Peptidoglycan biosynthesis              |
| sag00561 | Glycerolipid metabolism                 |
| sag00562 | Inositol phosphate metabolism           |
| sag00564 | Glycerophospholipid metabolism          |
| sag00620 | Pyruvate metabolism                     |
| sag00624 | 1- and 2-Methylnaphthalene degradation  |
| sag00630 | Glyoxylate and dicarboxylate metabolism |
| sag00632 | Benzoate degradation via CoA ligation   |
| sag00640 | Propanoate metabolism                   |
| sag00641 | 3-Chloroacrylic acid degradation        |
| sag00643 | Styrene degradation                     |
| sag00650 | Butanoate metabolism                    |
| sag00660 | C5-Branched dibasic acid metabolism     |
| sag00670 | One carbon pool by folate               |
| sag00680 | Methane metabolism                      |
| sag00710 | Carbon fixation                         |
| sag00730 | Thiamine metabolism                     |
| sag00740 | Riboflavin metabolism                   |
| sag00760 | Nicotinate and nicotinamide metabolism  |
| sag00770 | Pantothenate and CoA biosynthesis       |
| sag00780 | Biotin metabolism                       |
| sag00785 | Lipoic acid metabolism                  |
| sag00790 | Folate biosynthesis                     |
| sag00860 | Porphyrin and chlorophyll metabolism    |
| sag00900 | Terpenoid biosynthesis                  |
| sag00903 | Limonene and pinene degradation         |
| sag00910 | Nitrogen metabolism                     |
| sag00920 | Sulfur metabolism                       |
| sag00960 | Alkaloid biosynthesis II                |
| sag00970 | Aminoacyl-tRNA biosynthesis             |
| sag01032 | Glycan structures - degradation         |
| sag01040 | Polyunsaturated fatty acid biosynthesis |
| sag02010 | ABC transporters - General              |
| sag02020 | Two-component system - General          |
| sag02060 | Phosphotransferase system (PTS)         |
| sag03010 | Ribosome                                |
| sag03020 | RNA polymerase                          |
| sag03030 | DNA replication                         |
| sag03060 | Protein export                          |
| sag03090 | Type II secretion system                |

(End of table)
