# Supplementary material for: In silico prioritisation of candidate genes for prokaryotic gene function discovery: an application of phylogenetic profiles
Source: Springer Nature journal article supplement (doi:10.1186/1471-2105-10-86), 2009-03-17
Supplement: 12859_2008_2816_MOESM16_ESM.pdf [file 12859_2008_2816_MOESM16_ESM.pdf]

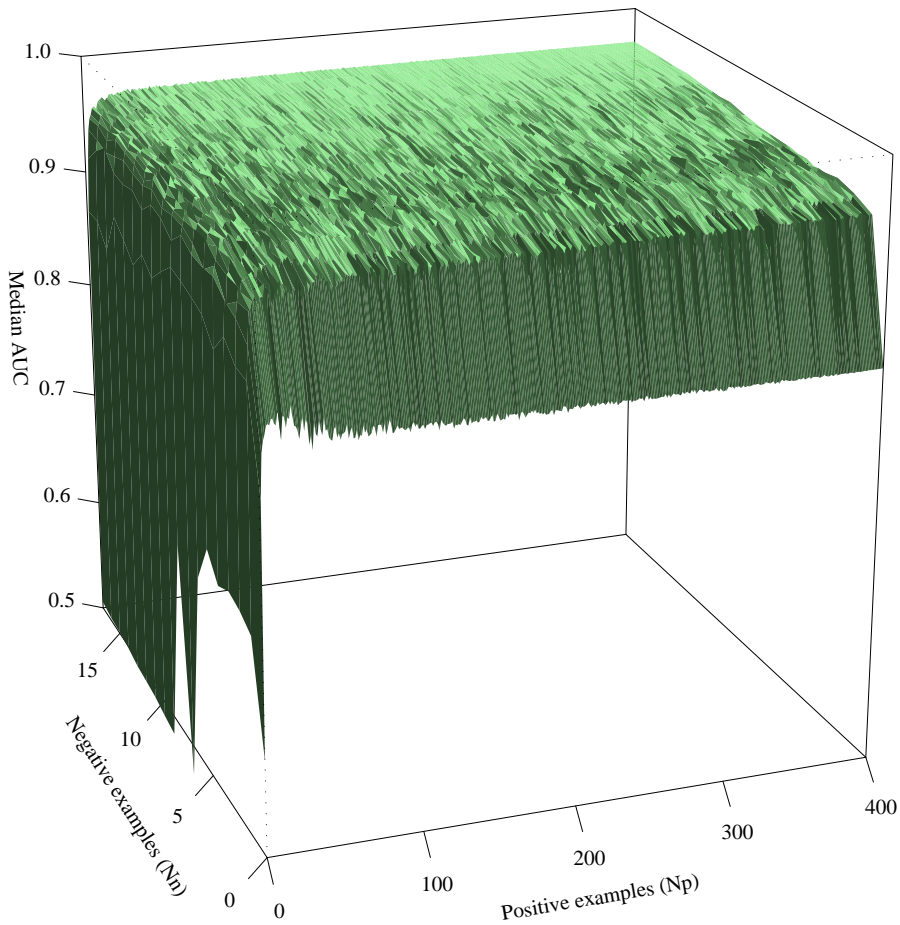

$$\widehat{\text{median}}(\text{AUC}) = 0.98253 - \frac{0.05717}{\sqrt{N_p}} - \frac{0.04061}{\sqrt{N_n}}, r^2 = 0.8499$$
