# Supplementary material for: In silico prioritisation of candidate genes for prokaryotic gene function discovery: an application of phylogenetic profiles
Source: Springer Nature journal article supplement (doi:10.1186/1471-2105-10-86), 2009-03-17

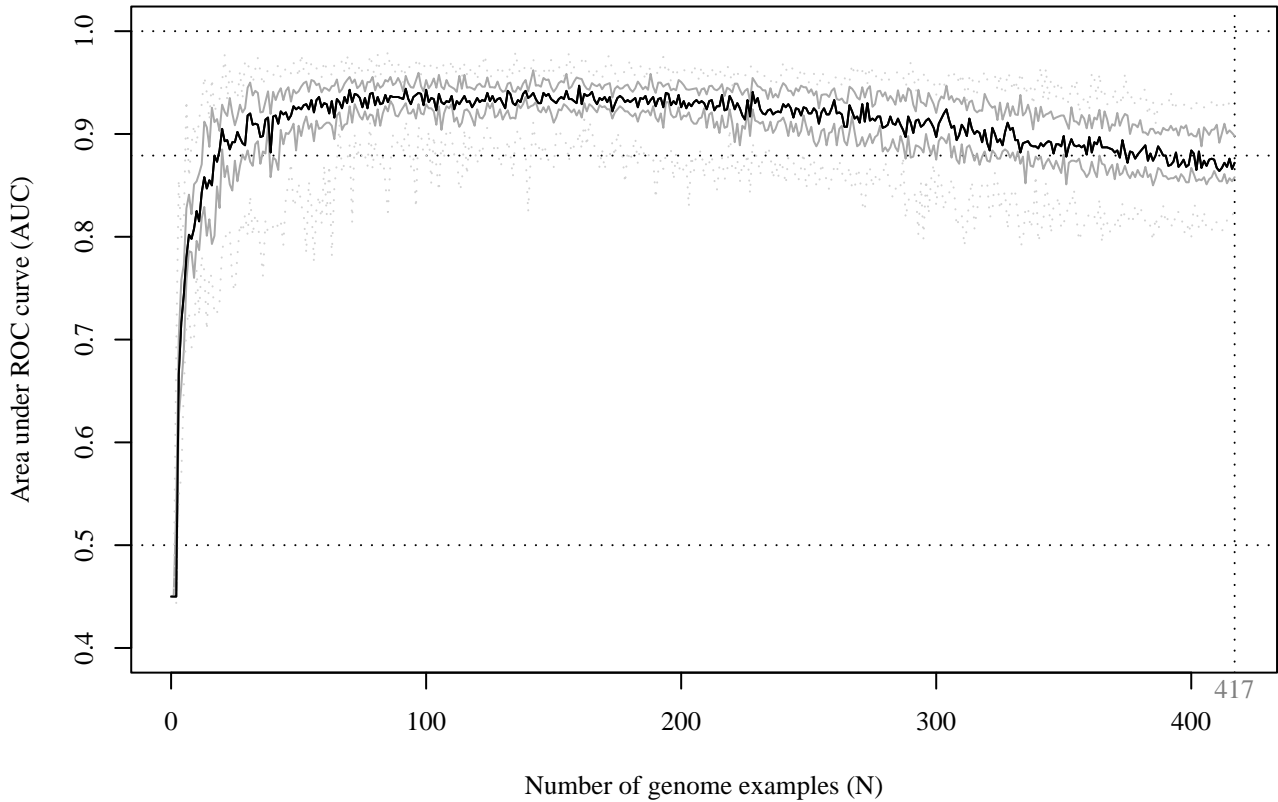

Supplement: 12859_2008_2816_MOESM17_ESM.pdf [file 12859_2008_2816_MOESM17_ESM.pdf]
